# Supplementary material for: A grinding-induced catalyst- and solvent-free synthesis of highly functionalized 1,4-dihydropyridines via a domino multicomponent reaction
Source: Royal Society of Chemistry journal article supplement (doi:10.1039/c1gc15223h), 2011-01-01
Supplement: c1gc15223h.pdf [file c1gc15223h.pdf]

Supporting information for  
**A Grinding-induced Catalyst- and Solvent-free  
Synthesis of Highly Functionalized 1,4-Dihydropyridines via  
a Domino Multicomponent Reaction**

Medicinal and Process Chemistry Division,  
Central Drug Research Institute, CSIR, Lucknow India

|                                                     |       |
|-----------------------------------------------------|-------|
| General Consideration.....                          | 2.    |
| General Procedure for synthesis of compounds.....   | 2.    |
| Analytical data.....                                | 3-10  |
| <sup>1</sup> H and <sup>13</sup> C NMR spectra..... | 10-40 |

### **General Consideration.**

All the reactions were carried out at room temperature that is 28-32<sup>0</sup>C. Unless otherwise specified, all the reagents were purchased from Sigma-Aldrich Chemical Co, Lancaster and were used directly without further any purification. NMR spectra were obtained using the Bruker DRX 300MHz spectrometer. Chemical shifts ( $\delta$ ) are given in ppm relative to TMS, coupling constants (J) in Hz. IR spectra were taken on VARIAN FT-IR spectrometer as KBr pellets. Reactions were monitored by thin layer chromatography. Elemental analyses were performed on a Carlo Erba's 108 or an Elementar's Vario EL III microanalyzer. The reactions under microwave heating were carried out in a Biotage initiator 2.5 microwave system. Thin layer chromatography (TLC) carried out on 0.25 mm silica gel plates visualized with UV light.

### **General procedure for synthesis of compounds 5(a-v), 6(a-e)**

A mixture of the appropriate aldehyde (1 mmol), aniline (1 mmol), DEAD (1 mmol), and malanonitrile(1mmol) was ground in a mortar and pestle at room temperature for the appropriate time. After two minute syrupy solution was observed, which was solidify on completion of reaction. After completion of the reaction give solid product **5a** with high purity.

### **General procedure for synthesis of compounds 7 (a-e)**

An oven dried microwave vial charged with Compound **5m**(1 mmol) and cyclohexanone (3 mmol), SDS (30 mol%), in 3 ml of water take in vial tube of microwave and irradiated at 150<sup>0</sup> C with stirring under microwave for 15 min. After the completion of the reaction were monitored by thin layer chromatography. The reaction was diluted with a 5 mL of ethyl acetate and washed with saturated aqueous NH<sub>4</sub>Cl solution. The aqueous part was extracted with ether. The combined organic part was washed with brine and dried over Na<sub>2</sub>SO<sub>4</sub>. The solvent was evaporated to yield a crude residue, which upon purification via silica gel column chromatography using EtOAc/hexane gave pure product **7a**.

**Diethyl 6-amino-5-cyano-1,4-diphenyl-1,4-dihydropyridine-2,3-dicarboxylate (5a).** Pale yellow solid, Mp. 160-162<sup>0</sup>C. Reaction time- 15min, Yield 92%, ESI MS (m/z) = 418 (M+H)<sup>+</sup>. <sup>1</sup>H NMR (300 MHz; CDCl<sub>3</sub>) δ<sub>H</sub> 7.52 (m, 3H, ArH), 7.40-7.39 (m, 5H, ArH), 7.28 (s, 2H, ArH), 4.71 (s, 1H, CH), 4.09-4.02 (m, 4H), 3.95-3.86 (m, 2H), 1.13 (t, J = 7.11 Hz, 3H, CH<sub>3</sub>), 0.98 (t, J = 7.14 Hz, 3H, CH<sub>3</sub>). Analysis calculated for C<sub>24</sub>H<sub>23</sub>N<sub>3</sub>O<sub>4</sub>: C, 69.05; H, 5.55; N, 10.07; Found: C, 69.07; H, 5.58; N, 10.11. <sup>13</sup>C NMR (75 MHz; CDCl<sub>3</sub>) δ<sub>C</sub> 165.1, 163.0, 149.6, 144.9, 141.5, 135.3, 130.4, 129.8, 128.7, 127.1, 127.0, 120.5, 105.4, 62.8, 61.9, 60.8, 38.7, 13.8, 13.4.

**Diethyl 6-amino-5-cyano-1,4-bis(4-methoxyphenyl)-1,4-dihydropyridine-2,3-dicarboxylate (5b).** Pale yellow solid, Mp. 168-170<sup>0</sup>C. Reaction time- 8min, Yield 88%, ESI MS (m/z) = 478 (M+H)<sup>+</sup>. <sup>1</sup>H NMR (300 MHz; CDCl<sub>3</sub>) δ<sub>H</sub> 7.28 (s, 4H, ArH), 6.99-6.90 (m, 4H, ArH), 4.64 (s, 1H, CH), 4.07-3.94 (m, 4H), 3.93-3.83 (m, 8H), 1.15 (t, J = 6.93 Hz, 3H, CH<sub>3</sub>), 1.04 (t, J = 6.96 Hz, 3H, CH<sub>3</sub>); <sup>13</sup>C NMR (75 MHz; CDCl<sub>3</sub>) δ<sub>C</sub> 165.5, 163.4, 160.9, 158.8, 150.0, 141.9, 137.7, 131.8, 128.4, 127.6, 121.0, 115.0, 114.2, 105.6, 63.0, 62.0, 60.9, 55.8, 55.4, 38.0, 14.1, 13.7. Analysis calculated for C<sub>26</sub>H<sub>27</sub>N<sub>3</sub>O<sub>6</sub>: C 65.40, H 5.70, N 8.80; Found: C 65.50, H 5.66, N 8.74.

**Diethyl 6-amino-1-(4-chlorophenyl)-5-cyano-4-(4-methoxyphenyl)-1,4-dihydropyridine-2,3-dicarboxylate (5c).** Pale yellow solid, Mp. 172-174<sup>0</sup>C, Reaction time- 7min, Yield 84%, ESI MS (m/z) = 482 (M+H)<sup>+</sup>. <sup>1</sup>H NMR (300 MHz; CDCl<sub>3</sub>) δ<sub>H</sub> 7.49 (d, J=8.58, 2H, ArH), 7.34-7.27 (m, 4H, ArH), 6.93 (d, J=8.58, 2H, ArH), 4.64 (s, 1H, CH), 4.09-4.02 (m, 5H), 3.99-3.82 (m, 4H), 1.15 (t, J = 7.08 Hz, 3H, CH<sub>3</sub>), 1.04 (t, J = 7.14 Hz, 3H, CH<sub>3</sub>); Analysis calculated for C<sub>25</sub>H<sub>24</sub>ClN<sub>3</sub>O<sub>5</sub>: C, 62.31; H, 5.02; N, 8.72; Found: C 62.37, H 5.16, N 8.79. <sup>13</sup>C NMR (75 MHz; CDCl<sub>3</sub>) δ<sub>C</sub> 164.5, 162.3, 158.2, 150.5, 140.9, 137.6, 134.6, 134.3, 132.3, 129.5, 127.9, 120.9, 114.0, 105.1, 61.4, 60.4, 59.9, 55.0, 37.9, 13.7, 13.0.

**Diethyl 6-amino-5-cyano-4-(4-methoxyphenyl)-1-p-tolyl-1,4-dihydropyridine-2,3-dicarboxylate (5d).** Pale yellow solid. Mp. 140-142<sup>0</sup>C. Reaction time- 10min, Yield 92%, ESI MS (m/z) = 462 (M+H)<sup>+</sup>. <sup>1</sup>H NMR (300 MHz; CDCl<sub>3</sub>) δ<sub>H</sub> 7.32-7.23 (m, 6H, ArH), 6.92 (d, J = 8.43 Hz, 2H, ArH), 4.64 (s, 1H, CH), 4.09-4.02 (m, 4H), 3.96-3.82 (m, 5H), 2.42 (s, 3H, CH<sub>3</sub>), 1.15 (t, J = 6.93 Hz, 3H, CH<sub>3</sub>), 1.01 (t, J = 7.11 Hz, 3H, CH<sub>3</sub>); <sup>13</sup>C NMR (75 MHz; CDCl<sub>3</sub>) δ<sub>C</sub> 165.5, 163.3, 158.8, 149.8, 141.6, 141.0, 137.7, 132.7, 130.6, 130.3, 128.5, 120.9, 114.2, 105.7, 63.1, 62.0, 60.9, 55.4, 38.1, 21.4, 14.1, 13.6. Analysis calculated for C<sub>26</sub>H<sub>27</sub>N<sub>3</sub>O<sub>5</sub>: C, 67.66; H, 5.90; N, 9.10; Found: C, 67.69; H, 5.81; N, 8.93.

**Diethyl 6-amino-5-cyano-1-(4-methoxyphenyl)-4-(3,4,5-trimethoxyphenyl)-1,4-dihydropyridine-2,3-dicarboxylate (5e).** Pale yellow solid, Mp. 162-164<sup>0</sup>C, Reaction time- 13min, Yield 99%, ESI MS (m/z) = 538 (M+H)<sup>+</sup>. <sup>1</sup>H NMR (300 MHz; CDCl<sub>3</sub>) δ<sub>H</sub> 7.26 (d, J = 8.8, 2H, ArH), 6.98 (d, J = 8.8Hz, 2H, ArH), 6.62 (s, 2H,

ArH), 4.63 (s, 1H, CH), 4.10-4.3.85 (m, 18H), 1.17 (t, J = 7.08 Hz, 3H, CH<sub>3</sub>), 1.04 (t, J = 7.14 Hz, 3H, CH<sub>3</sub>); <sup>13</sup>C NMR (75 MHz; CDCl<sub>3</sub>) δ<sup>o</sup>C 165.3, 163.2, 161.0, 153.5, 150.2, 142.3, 140.9, 137.2, 131.7, 127.5, 120.9, 115.1, 105.0, 104.0, 62.7, 62.1, 61.07, 61.02, 55.8, 38.7, 14.1, 13.7.. Analysis calculated for C<sub>28</sub>H<sub>31</sub>N<sub>3</sub>O<sub>8</sub>: C, 62.56; H, 5.81; N, 7.82; Found: C, 62.58; H, 5.88; N, 7.83.

**Diethyl 6-amino-1-(4-chlorophenyl)-5-cyano-4-(3,4,5-trimethoxyphenyl)-1,4-dihydropyridine-2,3-dicarboxylate (5f).** Pale yellow solid, Mp. 185-187<sup>o</sup>C, Reaction time- 12min, Yield 84%, ESI MS (m/z) = 542 (M+H)<sup>+</sup>. <sup>1</sup>H NMR (300 MHz; CDCl<sub>3</sub>) δ<sub>H</sub> 7.50 (s, J = 8.55 Hz, 2H, ArH), 7.30 (s, 2H, ArH), 6.60 (s, 2H, ArH), 4.64 (s, 1H, CH), 4.11-4.04 (m, 4H), 3.98-3.95 (m, 2H), 3.90-3.86 (m, 9H, OCH<sub>3</sub>), 1.17 (t, J = 7.08 Hz, 3H, CH<sub>3</sub>), 1.06 (t, J = 7.11 Hz, 3H, CH<sub>3</sub>); <sup>13</sup>C NMR (75 MHz; CDCl<sub>3</sub>) δ<sup>o</sup>C 165.3, 163.1, 153.7, 149.4, 141.5, 140.5, 137.3, 137.0, 134.0, 131.8, 130.4, 120.5, 105.8, 104.1, 63.7, 62.3, 61.2, 61.0, 56.2, 38.7, 14.2, 13.7. Analysis calculated for C<sub>27</sub>H<sub>28</sub>ClN<sub>3</sub>O<sub>7</sub>: C, 59.83; H, 5.21; N, 7.75; Found: C, 59.77; H, 5.14; N, 7.86.

**Diethyl 6-amino-5-cyano-1,4-bis(3,4,5-trimethoxyphenyl)-1,4-dihydropyridine-2,3-dicarboxylate (5g).** Pale yellow solid, Mp. 196-198<sup>o</sup>C Reaction time- 11min, Yield 84%, ESI MS (m/z) = 598 (M+H)<sup>+</sup>. <sup>1</sup>H NMR (300 MHz; CDCl<sub>3</sub>) δ<sub>H</sub> 6.63 (s, 2H, ArH), 6.54 (s, 2H, ArH), 4.65 (s, 1H, CH), 4.22(s, 2H), 4.11-4.00 (m, 4H), 3.91-3.86 (m, 18H), 1.18 (t, J = 6.99 Hz, 3H, CH<sub>3</sub>), 1.06 (t, J = 6.99 Hz, 3H, CH<sub>3</sub>); <sup>13</sup>C NMR (75 MHz; CDCl<sub>3</sub>) δ<sup>o</sup>C 165.3, 163.2, 153.9, 153.6, 149.9, 141.8, 140.8, 139.8, 137.3, 130.5, 120.8, 107.8, 105.5, 104.2, 62.8, 62.1, 61.2, 61.1, 61.0, 56.5, 56.2, 38.6, 14.1, 13.8. Analysis calculated for C<sub>30</sub>H<sub>35</sub>N<sub>3</sub>O<sub>10</sub>: C, 60.29; H, 5.90; N, 7.03; Found: C, 60.34; H, 6.01; N, 7.09.

**Diethyl 6-amino-5-cyano-1-p-tolyl-4-(3,4,5-trimethoxyphenyl)-1,4-dihydropyridine-2,3-dicarboxylate (5h).** Pale yellow solid, Mp. 175-177<sup>o</sup>C, Reaction time- 17min, Yield 96%, ESI MS (m/z) = 522 (M+H)<sup>+</sup>. <sup>1</sup>H NMR (300 MHz; CDCl<sub>3</sub>) δ<sub>H</sub> 7.30-7.28 (m, 2H, ArH), 7.22 (d, J = 8.1 Hz, 2H, ArH), 6.62 (s, 2H, ArH), 4.63 (s, 1H, CH), 4.10-4.08 (m, 4H, 2CH<sub>2</sub>), 3.94-3.86 (m, 11H), 2.42 (s, 3H, CH<sub>3</sub>), 1.17 (t, J = 7.1 Hz, 3H, CH<sub>3</sub>), 1.02 (t, J = 7.1 Hz, 3H, CH<sub>3</sub>); <sup>13</sup>C NMR (75 MHz; CDCl<sub>3</sub>) δ<sup>o</sup>C 165.4, 163.2, 153.6, 150.0, 142.1, 141.1, 140.9, 137.2, 132.7, 130.7, 130.2, 120.8, 105.2, 104.1, 62.9, 62.1, 61.1, 61.0, 56.2, 38.7, 21.4, 14.2, 13.6. Analysis calculated for C<sub>28</sub>H<sub>31</sub>N<sub>3</sub>O<sub>7</sub>: C 64.48, H 5.99, N 8.06; Found: C 64.50, H 5.95, N 8.10.

**Diethyl 6-amino-5-cyano-1-(2,4-dimethylphenyl)-4-(3,4,5-trimethoxyphenyl)-1,4-dihydropyridine-2,3-dicarboxylate (5i).** Pale yellow solid, Mp. 153-155<sup>o</sup>C, Reaction time- 13min, Yield 92%, ESI MS (m/z) = 536 (M+H)<sup>+</sup>. <sup>1</sup>H NMR (300 MHz; CDCl<sub>3</sub>) δ<sub>H</sub> 7.28 (s, 2H, ArH), 7.21 (s, 2H, ArH), 6.62 (s, 2H), 4.71(s, 1H, CH), 4.08-4.03 (m, 4H), 3.93-3.85 (m, 10H), 2.35 (s, 3H, CH<sub>3</sub>), 2.32 (s, 3H, CH<sub>3</sub>), 1.14 (t, J = 7.11 Hz, 3H, CH<sub>3</sub>), 0.99 (t, J = 7.14 Hz, 3H, CH<sub>3</sub>); <sup>13</sup>C NMR (75 MHz; CDCl<sub>3</sub>) δ<sup>o</sup>C 165.3, 162.8, 153.3, 149.1, 141.4, 141.1, 137.2,



136.8, 136.0, 133.6, 131.6, 131.4, 131.2, 131.0, 120.9, 104.4, 104.3, 104.1, 62.0, 61.8, 60.7, 55.9, 39.1, 38.8, 20.6, 17.4, 17.1, 13.9, 13.3. Analysis calculated for  $C_{29}H_{33}N_3O_7$ : C, 65.03; H, 6.21; N, 7.85; Found: C, 65.09; H, 6.17; N, 7.67.

**Diethyl 6-amino-1-(4-bromophenyl)-5-cyano-4-(3,4,5-trimethoxyphenyl)-1,4-dihydropyridine-2,3-dicarboxylate (5j).** Yield 95%, Mp. 187-189<sup>o</sup>C, Reaction time- 6min, ESI MS (m/z) = 586 (M+H)<sup>+</sup>. <sup>1</sup>H NMR (300 MHz; CDCl<sub>3</sub>) δ<sub>H</sub> 7.65 (d, J = 8.52 Hz, 2H, ArH), 7.23 (d, J = 8.49 Hz, 2H, ArH), 6.60 (s, 2H), 4.64 (s, 1H, CH), 4.11-4.04 (m, 4H), 3.98-3.95 (m, 2H), 3.90-3.86 (m, 9H, OCH<sub>3</sub>), 1.17 (t, J = 7.08 Hz, 3H, CH<sub>3</sub>), 1.06 (t, J = 7.11 Hz, 3H, CH<sub>3</sub>); <sup>13</sup>C NMR (75 MHz; CDCl<sub>3</sub>) δ<sub>C</sub> 165.2, 163.1, 153.6, 149.4, 141.4, 140.5, 137.3, 134.5, 133.4, 132.1, 125.0, 120.5, 105.8, 104.0, 63.6, 62.3, 61.2, 61.0, 56.2, 38.7, 14.1, 13.6. Analysis calculated for  $C_{27}H_{28}BrN_3O_7$ : C, 55.30; H, 4.81; N, 7.17; Found: C, 55.42; H, 4.85; N, 7.14.

**Diethyl 6-amino-5-cyano-1-phenyl-4-(3,4,5-trimethoxyphenyl)-1,4-dihydropyridine-2,3-dicarboxylate (5k).** Yellow solid, Mp. 146-148<sup>o</sup>C. Reaction time- 18min, Yield 91 %, ESI MS (m/z) = 508 (M+H)<sup>+</sup>. <sup>1</sup>H NMR (300 MHz; CDCl<sub>3</sub>) δ<sub>H</sub> 7.52-7.50 (m, 3H, ArH), 7.36-7.33 (m, 2H, ArH), 6.63 (s, 2H, ArH), 4.65 (s, 1H, CH), 4.11-4.08 (m, 4H, 2CH<sub>2</sub>), 3.91-3.87 (m, 11H), 1.17 (t, J = 7.1 Hz, 3H, CH<sub>3</sub>), 0.98 (t, J = 7.1 Hz, 3H, CH<sub>3</sub>); <sup>13</sup>C NMR (75 MHz; CDCl<sub>3</sub>) δ<sub>C</sub> 165.2, 163.1, 153.5, 149.8, 141.8, 140.8, 137.1, 135.4, 130.6, 120.7, 105.3, 104.0, 74.8, 74.6, 62.9, 62.1, 61.0, 60.9, 56.1, 38.7, 14.1, 13.5. Analysis calculated for  $C_{27}H_{29}N_3O_7$ : C 63.89, H 5.76, N 8.28; Found: C 63.90, H 5.80, N 8.25.

**Diethyl 6-amino-1-(4-bromophenyl)-5-cyano-4-(3,4-dimethoxyphenyl)-1,4-dihydropyridine-2,3-dicarboxylate (5l).** Yellow solid, Mp. 183-185<sup>o</sup>C, Reaction time- 14min, Yield 94%, ESI MS (m/z) = 557 (M+H)<sup>+</sup>. <sup>1</sup>H NMR (300 MHz; CDCl<sub>3</sub>) δ<sub>H</sub> 7.65 (d, J = 8.5 Hz, 2H, ArH), 7.28-7.22 (m, 2H, ArH), 6.92-6.90 (m, 3H, ArH), 4.64 (s, 1H, CH), 4.08-4.02 (m, 4H, 2CH<sub>2</sub>), 3.98-3.89 (m, 8H), 1.16 (t, J = 7.1 Hz, 3H, CH<sub>3</sub>), 1.05 (t, J = 7.2 Hz, 3H, CH<sub>3</sub>); <sup>13</sup>C NMR (75 MHz; CDCl<sub>3</sub>) δ<sub>C</sub> 165.3, 163.2, 149.2, 148.3, 141.1, 137.7, 134.6, 133.3, 132.2, 125.0, 120.5, 119.2, 111.7, 110.7, 106.2, 63.9, 62.3, 61.1, 56.0, 38.2, 14.1, 13.7. Analysis calculated for  $C_{26}H_{26}BrN_3O_6$ : C 56.12, H 4.71, N 7.55; Found: C 56.10, H 4.75, N 7.60.

**Diethyl 6-amino-1-(4-chlorophenyl)-5-cyano-4-(3,4-dimethoxyphenyl)-1,4-dihydropyridine-2,3-dicarboxylate (5m).**

Yield 84%, Mp. 177-178<sup>o</sup>C, Reaction time- 8min, ESI MS (m/z) = 512 (M+H)<sup>+</sup>. <sup>1</sup>H NMR (300 MHz; CDCl<sub>3</sub>) δ<sub>H</sub> 7.48 (d, J = 8.58 Hz, 2H, ArH), 7.31-7.28 (m, 2H, ArH), 6.91-6.90 (m, 3H, ArH), 4.63 (s, 1H, CH), 4.10-4.04 (m, 4H), 4.01-3.89 (m, 8H), 1.15 (t, J = 7.08 Hz, 3H, CH<sub>3</sub>), 1.04 (t, J = 7.14 Hz, 3H, CH<sub>3</sub>); <sup>13</sup>C NMR (75 MHz; CDCl<sub>3</sub>) δ<sub>C</sub> 165.2, 163.1, 149.4, 149.1, 148.2, 141.2, 137.7, 136.8, 134.0, 131.9, 130.2, 120.5, 119.1, 115.0,

111.7, 110.7, 106.1, 63.6, 62.2, 61.1, 56.0, 38.2, 14.1, 13.6. Analysis calculated for  $C_{26}H_{26}ClN_3O_6$  C, 61.00; H, 5.12; N, 8.21; Found: C, 61.12; H, 5.14; N, 8.14.

**Diethyl 6-amino-5-cyano-4-(3,4-dimethoxyphenyl)-1-(4-methoxyphenyl)-1,4-dihydropyridine-2,3-dicarboxylate (5n).** Yield 82%, Mp. 168-170°C, Reaction time- 11min ESI MS ( $m/z$ ) = 508 ( $M+H$ )<sup>+</sup>. <sup>1</sup>H NMR (300 MHz;  $CDCl_3$ )  $\delta_H$  7.28-7.25 (m, 2H, ArH), 6.97-6.90 (m, 5H, ArH), 4.63 (s, 1H, CH), 4.07-4.03 (m, 4H), 3.97-3.85 (m, 11H), 1.15 (t,  $J$  = 7.08 Hz, 3H,  $CH_3$ ), 1.03 (t,  $J$  = 7.14 Hz, 3H,  $CH_3$ ); Analysis calculated for  $C_{27}H_{29}N_3O_7$  C, 63.89; H, 5.76; N, 8.28; Found: C, 63.94; H, 5.85; N, 8.31. <sup>13</sup>C NMR (75 MHz;  $CDCl_3$ )  $\delta_C$  165.2, 163.1, 160.7, 149.8, 148.9, 148.0, 141.8, 138.0, 131.5, 127.4, 120.7, 119.0, 114.8, 111.4, 110.4, 105.1, 62.7, 61.8, 60.8, 55.9, 55.8, 55.6, 38.0, 13.9, 13.5.

**Diethyl 6-amino-1-(4-bromophenyl)-5-cyano-4-(4-methoxyphenyl)-1,4-dihydropyridine-2,3-dicarboxylate (5o).** Yield 88%, Mp. 175-177°C, Reaction time- 5min, ESI MS ( $m/z$ ) = 526 ( $M+H$ )<sup>+</sup>. <sup>1</sup>H NMR (300 MHz;  $CDCl_3$ )  $\delta_H$  7.65 (m, 2H, ArH), 7.33-7.26 (m, 4H, ArH), 6.95-6.91 (m, 2H, ArH), 4.66(s, 1H, CH), 4.13-3.94 (m, 6H, CH), 3.84 (s, 3H,  $OCH_3$ ), 1.18 (t,  $J$  = 10.6 Hz, 3H,  $CH_3$ ), 1.07 (t,  $J$  = 10.7 Hz, 3H,  $CH_3$ ); Analysis calculated for  $C_{25}H_{24}BrN_3O_5$  C, 57.04; H, 4.60; N, 7.98; Found: C, 57.08; H, 4.76; N, 8.26. <sup>13</sup>C NMR (75 MHz;  $CDCl_3$ )  $\delta_C$  164.9, 162.8, 158.6, 150.8, 141.2, 138.0, 135.1, 132.8, 128.3, 123.8, 121.2, 114.3, 105.7, 61.8, 60.8, 60.7, 55.3, 14.1, 13.5.

**Diethyl 6-amino-5-cyano-1-(4-ethoxyphenyl)-4-(4-methoxyphenyl)-1,4-dihydropyridine-2,3-dicarboxylate (5p).** Yield 92%, Mp. 166-167°C, Reaction time- 16min ESI MS ( $m/z$ ) = 492 ( $M+H$ )<sup>+</sup>. <sup>1</sup>H NMR (300 MHz;  $CDCl_3$ )  $\delta_H$  7.34-7.27 (m, 4H, ArH), 6.99-6.90 (m, 4H, ArH), 4.65 (s, 1H, CH), 4.13-3.86 (m, 8H), 3.84 (s, 3H,  $OCH_3$ ), 1.51 (t,  $J$  = 10.4 Hz, 3H,  $CH_3$ ), 1.18 (t,  $J$  = 10.6 Hz, 3H,  $CH_3$ ), 1.06 (t,  $J$  = 10.7 Hz, 3H,  $CH_3$ ); Analysis calculated for  $C_{27}H_{29}N_3O_6$  C, 65.97; H, 5.95; N, 8.55; Found: C, 66.13; H, 6.00; N, 8.43. <sup>13</sup>C NMR (75 MHz;  $CDCl_3$ )  $\delta_C$  165.3, 163.2, 160.1, 158.6, 149.8, 141.7, 137.6, 131.6, 128.3, 127.1, 120.8, 115.3, 114.0, 105.3, 63.9, 62.7, 61.8, 60.7, 55.2, 37.8, 14.6, 13.9, 13.5.

**Diethyl 6-amino-1-(4-bromophenyl)-4-(4-chlorophenyl)-5-cyano-1,4-dihydropyridine-2,3-dicarboxylate (5q).** Yield 93%, Mp. 183-185°C, Reaction time- 6min ESI MS ( $m/z$ ) = 530 ( $M+H$ )<sup>+</sup>. <sup>1</sup>H NMR (300 MHz;  $CDCl_3$ )  $\delta_H$  7.69 (dd,  $J$  = 9.99, 3.0 Hz, 2H, ArH), 7.40-7.25 (m, 6H, ArH), 4.69 (s, 1H, CH), 4.13-3.94 (m, 6H), 1.17 (t,  $J$  = 10.6 Hz, 3H,  $CH_3$ ), 1.08 (t,  $J$  = 10.7 Hz, 3H,  $CH_3$ ); Analysis calculated for  $C_{24}H_{21}BrClN_3O_4$  C, 54.31; H, 3.99; 6.68; N, 7.92; Found: C, 54.37; H, 4.13; 6.74; N, 8.14. <sup>13</sup>C NMR (75 MHz;  $CDCl_3$ )  $\delta_C$  164.8, 162.7, 149.3, 143.2, 141.3, 134.1, 133.2, 132.9, 132.0, 128.9, 128.5, 125.0, 120.1, 105.4, 62.9, 62.2, 61.0, 38.2, 13.8, 13.4.

**Diethyl 6-amino-1-(4-bromophenyl)-5-cyano-4-(2,4-dichlorophenyl)-1,4-dihydropyridine-2,3-dicarboxylate (5r).** Yield 98%, Mp. 180-181<sup>0</sup>C, Reaction time- 8min, ESIMS (m/z) = 564 (M+H)<sup>+</sup>. <sup>1</sup>H NMR (300 MHz; CDCl<sub>3</sub>) δ<sub>H</sub> 7.66 (d, J= 8.49 Hz, 2H, ArH), 7.42-7.26 (m, 5H, ArH), 5.26 (s, 1H, CH), 4.07-3.90 (m, 6H), 1.10-1.01 (m, 6H, CH<sub>3</sub>); Analysis calculated for C<sub>24</sub>H<sub>20</sub>BrCl<sub>2</sub>N<sub>3</sub>O<sub>4</sub> C, 51.00; H, 3.57; N, 7.43; Found: C, 51.04; H, 3.51; N, 7.52. <sup>13</sup>C NMR (75 MHz; CDCl<sub>3</sub>) δ<sub>C</sub> 169.2, 167.2, 155.6, 147.6, 146.9, 139.3, 137.68, 137.60, 137.3, 136.0, 133.7, 132.9, 128.9, 125.2, 108.4, 66.6, 65.5, 64.0, 40.5, 18.7, 18.2.

**Diethyl 6-amino-4-(4-(benzyloxy)phenyl)-1-(4-bromophenyl)-5-cyano-1,4-dihydropyridine-2,3-dicarboxylate (5s).** Yield 95%, Mp. 173-174<sup>0</sup>C, Reaction time- 15min, ESI MS (m/z) = 602 (M+H)<sup>+</sup>. <sup>1</sup>H NMR (300 MHz; CDCl<sub>3</sub>) δ<sub>H</sub> 7.93 (d, J= 8.8 Hz, 3H, ArH), 7.65 (d, J= 9.03, 4H), 7.25-6.97 (m, 6H), 5.08 (s, 2H, -OCH<sub>2</sub>), 4.65 (s, 1H, CH), 4.10-3.93 (m, 6H), 1.14 (t, J = 7.11 Hz, 3H, CH<sub>3</sub>), 1.05 (t, J = 7.11 Hz, 3H, CH<sub>3</sub>); Analysis calculated for C<sub>31</sub>H<sub>28</sub>BrN<sub>3</sub>O<sub>5</sub> C, 61.80; H, 4.68; N, 6.97; Found: C, 61.88; H, 4.73; N, 6.91. <sup>13</sup>C NMR (75 MHz; CDCl<sub>3</sub>) δ<sub>C</sub> 165.1, 163.9, 162.9, 158.8, 149.1, 140.8, 137.4, 135.4, 132.1, 128.59, 128.53, 128.3, 127.9, 124.8, 120.3, 115.0, 114.4, 113.3, 106.2, 63.7, 62.1, 60.9, 37.9, 13.9, 13.4.

**Diethyl 6-amino-5-cyano-4-(4-nitrophenyl)-1-p-tolyl-1,4-dihydropyridine-2,3-dicarboxylate (5t).** Yield 96%, Mp. 170-172<sup>0</sup>C Reaction time- 7min, ESI MS (m/z) = 477 (M+H)<sup>+</sup>. <sup>1</sup>H NMR (300 MHz; CDCl<sub>3</sub>) δ<sub>H</sub> 8.28 (d, J= 8.4 Hz, 2H, ArH), 7.58 (d, J= 8.49, 2H), 7.33-7.24 (m, 4H), 4.83 (s, 1H, CH), 4.17 (s, 2H, NH<sub>2</sub>), 4.09-3.89 (m, 4H), 2.43 (s, 3H, CH<sub>3</sub>), 1.13 (t, J = 7.08 Hz, 3H, CH<sub>3</sub>), 1.03 (t, J = 7.11 Hz, 3H, CH<sub>3</sub>); Analysis calculated for C<sub>25</sub>H<sub>24</sub>N<sub>4</sub>O<sub>6</sub> C, 63.02; H, 5.08; N, 11.76; Found: C, 63.05; H, 5.14; N, 11.81. <sup>13</sup>C NMR (50 MHz; CDCl<sub>3</sub>) δ<sub>C</sub> 164.1, 162.1, 152.1, 150.3, 146.3, 142.3, 140.4, 131.6, 129.9, 129.7, 127.6, 123.5, 102.9, 61.4, 60.4, 59.1, 20.7, 13.4, 12.8.

**Triethyl 6-amino-1-(4-methoxyphenyl)-4-(3,4,5-trimethoxyphenyl)-1,4-dihydropyridine-2,3,5-tricarboxylate (6a).** Yield 91%, Mp. 184-186<sup>0</sup>C, Reaction time- 18min, ESI MS (m/z) = 485 (M+H)<sup>+</sup>. <sup>1</sup>H NMR (300 MHz; CDCl<sub>3</sub>) δ<sub>H</sub> 7.28 (d, J= 8.7 Hz, 2H, ArH), 6.98 (d, J= 8.88, 2H), 6.69 (s, 2H), 6.23 (s, 2H, NH<sub>2</sub>), 5.01 (s, 1H, CH), 4.17-4.11 (m, 4H), 3.95-3.84 (m, 14H), 1.32 (t, J = 7.08 Hz, 3H, CH<sub>3</sub>), 1.23 (t, J = 7.11 Hz, 3H, CH<sub>3</sub>), 1.03 (t, J = 7.17 Hz, 3H, CH<sub>3</sub>); Analysis calculated for C<sub>30</sub>H<sub>36</sub>N<sub>2</sub>O<sub>10</sub> C, 61.63; H, 6.21; N, 4.79; Found: C, 61.72; H, 6.28; N, 4.83. <sup>13</sup>C NMR (75 MHz; CDCl<sub>3</sub>) δ<sub>C</sub> 169.5, 165.6, 163.5, 160.6, 153.4, 152.7, 151.6, 142.7, 141.7, 136.3, 131.6, 129.0, 127.6, 114.8, 114.6, 107.2, 104.7, 79.9, 63.2, 61.6, 60.9, 60.7, 60.6, 59.2, 56.3, 55.8, 55.5, 36.8, 14.6, 14.0, 13.5, 13.4.

**Triethyl 6-amino-1-(4-bromophenyl)-4-(4-chlorophenyl)-1,4-dihydropyridine-2,3,5-tricarboxylate (6b).** Yield 93%, Mp. 115-117<sup>0</sup>C, Reaction time- 12min, ESI MS (m/z) = 577 (M+H)<sup>+</sup>. <sup>1</sup>H NMR (300 MHz; CDCl<sub>3</sub>)

$\delta_{\text{H}}$  7.61 (d,  $J = 8.5$  Hz, 2H, ArH), 7.35-7.25 (m, 6H, ArH), 6.18 (s, 2H,  $\text{NH}_2$ ), 5.00 (s, 1H, -CH), 4.13-4.06 (m, 4H), 3.97-3.89 (m, 2H), 1.27-1.16 (m, 6H,  $\text{CH}_3$ ), 1.03 (t,  $J = 7.11$  Hz, 3H,  $\text{CH}_3$ ). Analysis calculated for  $\text{C}_{26}\text{H}_{26}\text{BrClN}_2\text{O}_6$  C, 54.04; H, 4.54; N, 4.85; Found: C, 54.08; H, 4.59; N, 5.07.  $^{13}\text{C}$  NMR (75 MHz;  $\text{CDCl}_3$ )  $\delta_{\text{C}}$  169.3, 165.3, 163.2, 150.8, 145.5, 140.8, 134.4, 133.1, 132.6, 131.8, 129.3, 128.0, 124.6, 107.8, 80.1, 61.9, 60.8, 59.4, 36.7, 14.3, 13.9, 13.4.

**Triethyl 6-amino-4-(4-nitrophenyl)-1-p-tolyl-1,4-dihydropyridine-2,3,5-tricarboxylate (6c).** Yield 91%, Mp. 191-192 $^{\circ}\text{C}$ , Reaction time- 20min, ESI MS ( $m/z$ ) = 524 ( $\text{M}+\text{H}$ ) $^{+}$ .  $^1\text{H}$  NMR (300 MHz;  $\text{CDCl}_3$ )  $\delta_{\text{H}}$  8.81 (d,  $J = 8.2$  Hz, 2H, ArH), 7.65 (d,  $J = 8.2$ , 2H, ArH), 7.23-7.17 (m, 4H), 4.75 (s, 1H, -CH), 4.11-3.83 (m, 6H), 3.45-3.39 (m, 2H), 2.36 (s, 3H,  $\text{ArCH}_3$ ), 1.17 (t,  $J = 6.9$  Hz, 3H,  $\text{CH}_3$ ), 1.05 (t,  $J = 6.9$  Hz, 3H,  $\text{CH}_3$ ), 0.95 (t,  $J = 6.9$  Hz, 3H,  $\text{CH}_3$ ); Analysis calculated for  $\text{C}_{27}\text{H}_{29}\text{N}_3\text{O}_8$  C, 61.94; H, 5.58; N, 8.03; Found: C, 61.97; H, 5.65; N, 8.07.  $^{13}\text{C}$  NMR (75 MHz;  $\text{CDCl}_3$ )  $\delta_{\text{C}}$  163.4, 161.3, 151.7, 149.9, 145.7, 141.7, 139.5, 131.1, 129.1, 127.0, 122.8, 119.5, 102.2, 60.7, 59.7, 58.1, 20.1, 12.8, 12.2.

**Triethyl 6-amino-1,4-bis(4-chlorophenyl)-1,4-dihydropyridine-2,3,5-tricarboxylate (6d).** Yield 84%, Mp. 176-178 $^{\circ}\text{C}$ , Reaction time- 10min, ESI MS ( $m/z$ ) = 533 ( $\text{M}+\text{H}$ ) $^{+}$ .  $^1\text{H}$  NMR (300 MHz;  $\text{CDCl}_3$ )  $\delta_{\text{H}}$  7.51 (d,  $J = 8.6$  Hz, 2H, ArH), 7.36-7.25 (m, 6H), 6.18 (s, 2H,  $\text{NH}_2$ ), 5.0 (s, 1H, -CH), 4.14-4.10 (m, 4H), 3.53 (q,  $J = 7.0$ , 2H), 1.27-0.98 (m, 9H). Analysis calculated for  $\text{C}_{26}\text{H}_{26}\text{Cl}_2\text{N}_2\text{O}_6$  C, 58.54; H, 4.91; N, 5.25; Found: C, 58.57; H, 4.94; N, 5.22.  $^{13}\text{C}$  NMR (75 MHz;  $\text{CDCl}_3$ )  $\delta_{\text{C}}$  169.3, 165.3, 163.3, 150.9, 145.5, 140.9, 136.5, 133.8, 132.0, 131.8, 130.0, 129.3, 128.0, 107.8, 80.1, 61.9, 60.8, 59.4, 50.7, 36.7, 14.3, 13.9, 13.4.

**Diethyl 6-amino-5-carbamoyl-1,4-bis(4-chlorophenyl)-1,4-dihydropyridine-2,3-dicarboxylate (6e).** Yield 79%, Mp. 218-220 $^{\circ}\text{C}$  Reaction time- 20min, ESI MS ( $m/z$ ) = 504 ( $\text{M}+\text{H}$ ) $^{+}$ .  $^1\text{H}$  NMR (300 MHz;  $\text{CDCl}_3$ )  $\delta_{\text{H}}$  7.66 (d,  $J = 8.5$  Hz, 2H, ArH), 7.38-7.28 (m, 4H), 7.01 (t,  $J = 8.7$  Hz, 2H, ArH), 6.68 (s, 2H,  $\text{CONH}_2$ ), 6.1 (s, 2H,  $\text{NH}_2$ ), 5.0 (s, 1H, -CH), 4.16-3.98 (m, 4H), 1.28-1.16 (m, 6H). Analysis calculated for  $\text{C}_{24}\text{H}_{23}\text{Cl}_2\text{N}_3\text{O}_5$  C, 57.15; H, 4.60; N, 8.33; Found: C, 57.15; H, 4.60; N, 8.33.  $^{13}\text{C}$  NMR (75 MHz;  $\text{CDCl}_3$ )  $\delta_{\text{C}}$  169.4, 165.4, 163.3, 163.0, 159.7, 150.7, 142.8, 140.6, 134.5, 133.0, 132.4, 129.5, 129.4, 124.6, 114.8, 114.5, 108.1, 80.4, 61.9, 60.7, 59.4, 36.6, 14.3, 13.9, 13.4.

**Diethyl 5-amino-1-(4-chlorophenyl)-4-(3,4-dimethoxyphenyl)-1,4,6,7,8,9-hexahydrobenzo[b][1,8]naphthyridine-2,3-dicarboxylate (7a).** White solid. Yield 65%, Mp. 197-199 $^{\circ}\text{C}$ , ESI MS ( $m/z$ ) = 592 ( $\text{M}+\text{H}$ ) $^{+}$ .  $^1\text{H}$  NMR (300 MHz;  $\text{CDCl}_3$ )  $\delta_{\text{H}}$  7.52 (d,  $J = 8.4$  Hz, 2H, ArH), 7.24 (d, 2H,  $J = 8.4$ , ArH), 6.93-6.85 (m, 3H, ArH), 5.26 (s, 2H,  $\text{NH}_2$ ), 4.68 (s, 1H, CH), 4.09-3.81 (m, 10H), 2.42-2.08 (m, 4H), 1.79 (m, 4H), 1.12 (t,  $J = 7.08$  Hz, 3H,  $\text{CH}_3$ ), 1.03 (t,  $J = 7.14$  Hz, 3H,  $\text{CH}_3$ ). Analysis calculated for  $\text{C}_{32}\text{H}_{34}\text{ClN}_3\text{O}_6$  C,

64.91; H, 5.79; N, 7.10; Found: C, 64.94; H, 5.85; N, 7.23.  $^{13}\text{C}$  NMR (75 MHz;  $\text{CDCl}_3$ )  $\delta_{\text{C}}$  167.8, 166.7, 161.5, 159.5, 156.1, 149.3, 145.5, 142.2, 140.2, 135.5, 130.3, 128.7, 124.1, 119.4, 115.5, 113.6, 109.8, 108.6, 100.3, 62.8, 62.3, 55.6, 55.1, 38.1, 28.6, 26.5, 22.6, 14.1, 13.8.

**Diethyl 5-amino-1-(4-ethoxyphenyl)-4-(4-methoxyphenyl)-1,4,6,7,8,9-hexahydrobenzo[b][1,8]naphthyridine-2,3-dicarboxylate (7b).** White solid. Yield 52%, Mp. 191-192 $^{\circ}\text{C}$ , ESI MS ( $m/z$ ) = 572 ( $\text{M}+\text{H}$ ) $^{+}$ .  $^1\text{H}$  NMR (300 MHz;  $\text{CDCl}_3$ )  $\delta_{\text{H}}$  7.36-7.23(m, 4H), 5.41(s, 2H,  $\text{NH}_2$ ), 4.68(s, 1H, CH), 4.18-3.77(m, 9H), 2.38-1.94 (m, 4H), 1.78-1.64 (m, 4H), 7.04-6.92 (m, 4H, ArH), 1.52 (t,  $J$  = 10.3 Hz, 3H,  $\text{CH}_3$ ), 1.12 (t,  $J$  = 10.6 Hz, 3H,  $\text{CH}_3$ ), 0.98 (t,  $J$  = 10.7 Hz, 3H,  $\text{CH}_3$ ); Analysis calculated for  $\text{C}_{33}\text{H}_{37}\text{N}_3\text{O}_6$  C, 69.33; H, 6.52; N, 7.35; Found: C, 69.36; H, 6.58; N, 7.43.  $^{13}\text{C}$  NMR (75 MHz;  $\text{CDCl}_3$ )  $\delta_{\text{C}}$  167.8, 166.7, 158.9, 156.9, 154.5, 152.2, 142.8, 136.3, 132.6, 127.8, 127.4, 116.9, 116.4, 116.1, 114.4, 110.8, 101.2, 64.4, 62.3, 61.9, 55.1, 37.9, 28.6, 26.6, 21.5, 14.2, 13.8.

**Diethyl 5-amino-1-(4-bromophenyl)-4-(4-chlorophenyl)-1,4,6,7,8,9-hexahydrobenzo[b][1,8]naphthyridine-2,3-dicarboxylate (7c).** White solid. Yield 68%, Mp. 203-205 $^{\circ}\text{C}$ , ESI MS ( $m/z$ ) = 610 ( $\text{M}+\text{H}$ ) $^{+}$ .  $^1\text{H}$  NMR (300 MHz;  $\text{CDCl}_3$ )  $\delta_{\text{H}}$  7.64 (dd,  $J$  = 10.01, 3.0 Hz, 2H, ArH), 7.37-7.15 (m, 6H, ArH), 6.39 (s, 2H,  $\text{NH}_2$ ), 4.68 (s, 1H, CH), 4.13-3.98 (m, 4H), 2.39-2.12(m, 4H), 1.68(m, 4H), 1.17 (t,  $J$  = 10.6 Hz, 3H,  $\text{CH}_2\text{CH}_3$ ), 1.08 (t,  $J$  = 10.7 Hz, 3H,  $\text{CH}_2\text{CH}_3$ ); Analysis calculated for  $\text{C}_{30}\text{H}_{29}\text{BrClN}_3\text{O}_4$  C, 58.98; H, 4.78; N, 6.88; Found: C, 59.05; H, 4.88; N, 6.91.  $^{13}\text{C}$  NMR (75 MHz;  $\text{CDCl}_3$ )  $\delta_{\text{C}}$  167.5, 166.8, 161.8, 160.1, 158.3, 146.5, 144.7, 135.0, 132.3, 128.5, 124.1, 120.3, 116.9, 116.1, 113.9, 109.5, 108.7, 102.4, 62.4, 38.3, 28.7, 26.6, 22.6, 14.1.

**Diethyl 5-amino-1-(4-bromophenyl)-4-(2,4-dichlorophenyl)-1,4,6,7,8,9-hexahydrobenzo[b][1,8]naphthyridine-2,3-dicarboxylate (7d).** White solid. Yield 79%, Mp. 227-228 $^{\circ}\text{C}$ , ESI MS ( $m/z$ ) = 644 ( $\text{M}+\text{H}$ ) $^{+}$ .  $^1\text{H}$  NMR (300 MHz;  $\text{CDCl}_3$ )  $\delta_{\text{H}}$  7.64(d,  $J$  = 8.50 Hz, 2H, ArH), 7.33-7.17 (m, 5H, ArH), 5.82(s, 2H,  $\text{NH}_2$ ), 4.61(s, 1H, CH), 4.04-3.78 (m, 4H), 2.69-2.42 (m, 4H), 1.82-1.59 (m, 4H), 1.15 (t,  $J$  = 8.89 Hz, 3H,  $\text{CH}_2\text{CH}_3$ ), 1.04 (t,  $J$  = 8.98 Hz, 3H,  $\text{CH}_2\text{CH}_3$ ); Analysis calculated for  $\text{C}_{30}\text{H}_{28}\text{BrCl}_2\text{N}_3\text{O}_4$  C, 55.83; H, 4.37; N, 6.51; Found: C, 55.85; H, 4.40; N, 6.53.  $^{13}\text{C}$  NMR (75 MHz;  $\text{CDCl}_3$ )  $\delta_{\text{C}}$  168.0, 167.0, 161.9, 160.2, 150.1, 146.7, 144.8, 135.3, 133.0, 129.0, 124.6, 117.7, 116.6, 120.3, 114.3, 109.8, 102.7, 62.7, 49.5, 28.9, 26.7, 22.9, 14.3.

**Diethyl 5-amino-4-(4-(benzyloxy)phenyl)-1-(4-bromophenyl)-1,4,6,7,8,9-hexahydrobenzo[b][1,8]naphthyridine-2,3-dicarboxylate (7e).**

White solid. Yield 61%, Mp. 232-234 $^{\circ}\text{C}$ , ESI MS ( $m/z$ ) = 682 ( $\text{M}+\text{H}$ ) $^{+}$ .  $^1\text{H}$  NMR (300 MHz;  $\text{CDCl}_3$ )  $\delta_{\text{H}}$  7.91 (d,  $J$  = 8.8 Hz, 3H, ArH), 7.63 (d,  $J$  = 9.05, 4H), 7.41-7.21 (m, 6H), 6.16 (s, 2H,  $\text{NH}_2$ ), 5.02 (s, 2H,  $-\text{OCH}_2$ ), 4.58 (s,

1H, CH), 4.10-3.93 (m, 4H), 2.43-2.38 (m, 2H), 2.22-2.18 (m, 2H), 2.64-2.49 (m, 4H), 1.14 (t, J = 7.10 Hz, 3H, CH<sub>3</sub>), 0.98 (t, J = 7.11 Hz, 3H, CH<sub>3</sub>); Analysis calculated for C<sub>37</sub>H<sub>36</sub>BrN<sub>3</sub>O<sub>5</sub> C, 65.10; H, 5.32; N, 6.16; Found: C, 65.04; H, 5.37; N, 6.19. <sup>13</sup>C NMR (75 MHz; CDCl<sub>3</sub>) δ<sub>C</sub> 167.8, 166.8, 160.7, 158.8, 156.1, 154.1, 142.7, 142.4, 136.5, 133.3, 132.5, 131.0, 129.1, 127.9, 127.5, 116.9, 116.4, 115.1, 114.5, 110.8, 101.3, 71.6, 62.6, 62.4, 38.0, 28.7, 26.6, 21.5, 14.0.

**Diethyl 2-(4-methoxyphenylamino)maleate (Intermediate).** Oil, ESI MS (m/z) = 294 (M+H)<sup>+</sup>. <sup>1</sup>H NMR (300 MHz; CDCl<sub>3</sub>) δ<sub>H</sub> 9.58 (s, 1H, NH), 6.92 (d, 2H, J=8.9 Hz, ArH), 6.84 (d, 2H, J=8.9 Hz), 5.30 (s, 1H), 4.23-4.10 (m, 4H), 3.79 (s, 3H), 1.37 (t, 3H, J= 7.14Hz), 1.10(t, 3H, J= 7.14 Hz).

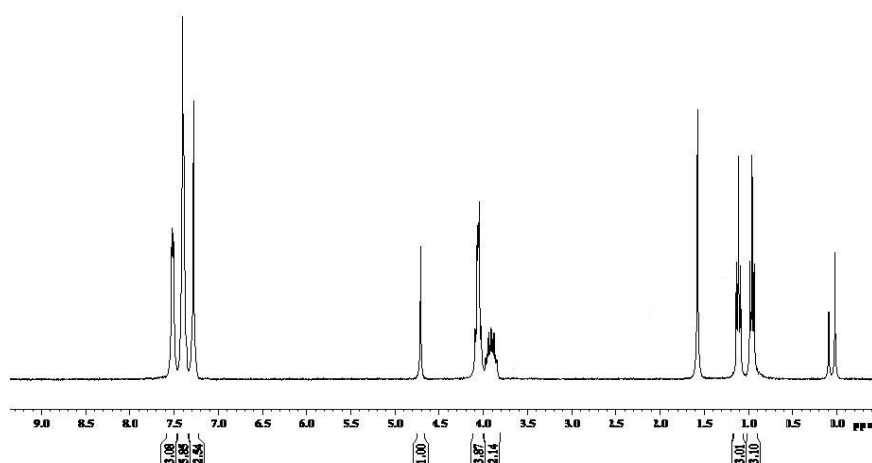

**Diethyl 6-amino-5-cyano-1,4-diphenyl-1,4-dihydropyridine-2,3-dicarboxylate (5a).**

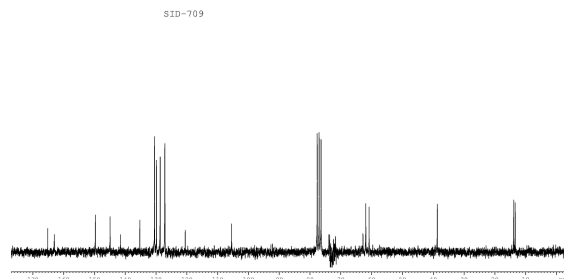

**Diethyl 6-amino-5-cyano-1,4-diphenyl-1,4-dihydropyridine-2,3-dicarboxylate (5a).**

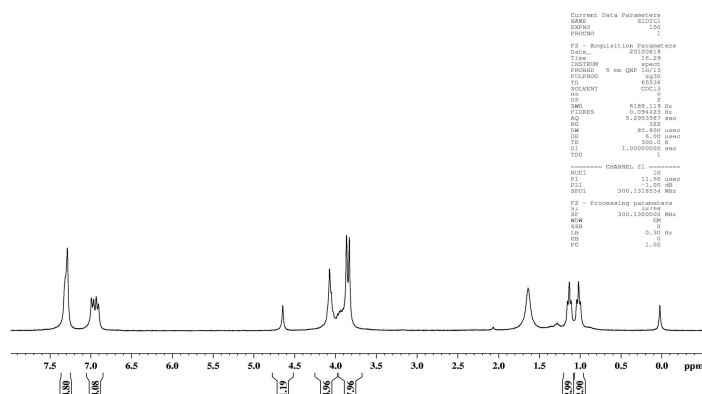

Diethyl 6-amino-5-cyano-1,4-bis(4-methoxyphenyl)-1,4-dihydropyridine-2,3-dicarboxylate (5b).

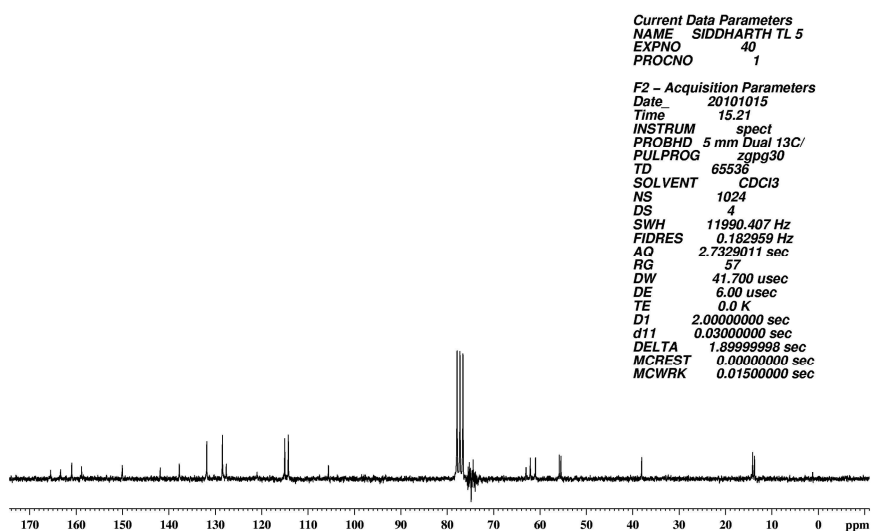

Diethyl 6-amino-5-cyano-1,4-bis(4-methoxyphenyl)-1,4-dihydropyridine-2,3-dicarboxylate (5b).

**Diethyl 6-amino-1-(4-chlorophenyl)-5-cyano-4-(4-methoxyphenyl)-1,4-dihydropyridine-2,3-dicarboxylate (5c).**



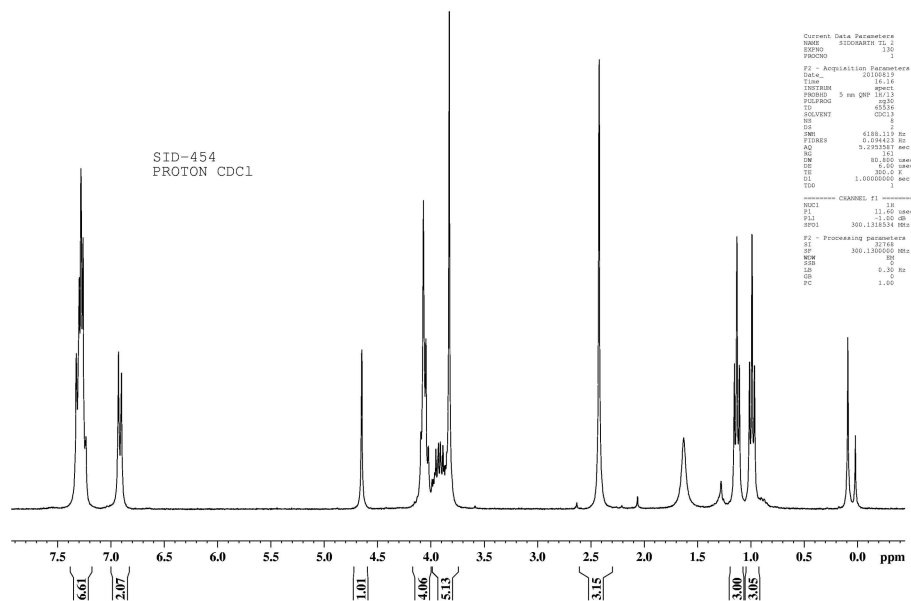

Diethyl 6-amino-5-cyano-4-(4-methoxyphenyl)-1-p-tolyl-1,4-dihydropyridine-2,3-dicarboxylate (5d).

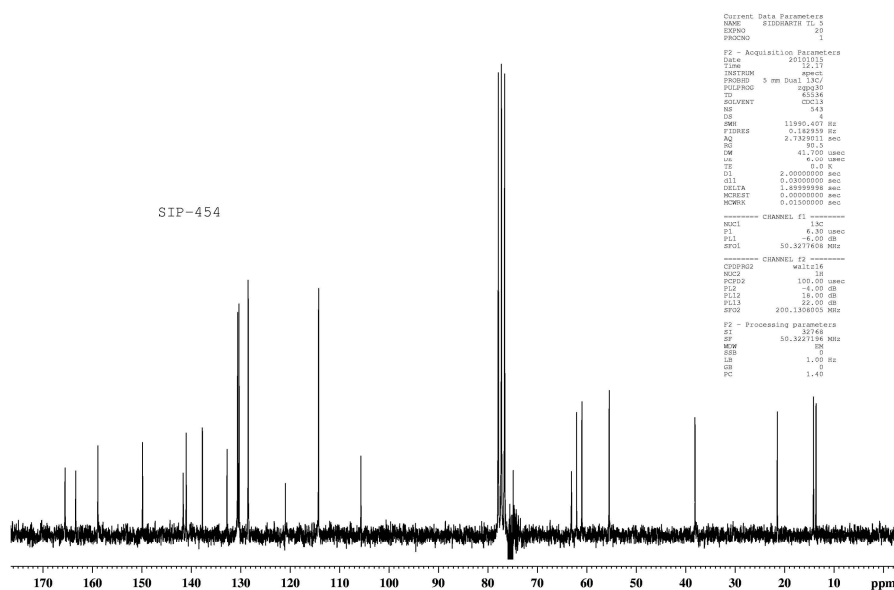

Diethyl 6-amino-5-cyano-4-(4-methoxyphenyl)-1-p-tolyl-1,4-dihydropyridine-2,3-dicarboxylate (5d).

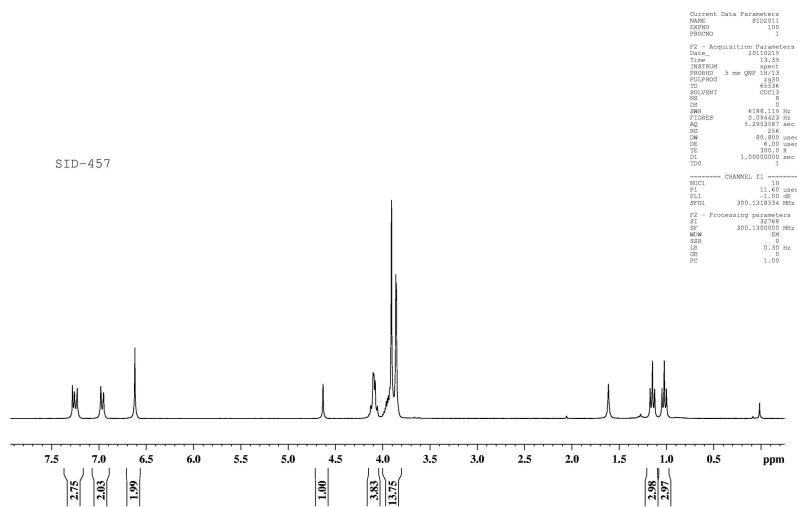

**Diethyl 6-amino-5-cyano-1-(4-methoxyphenyl)-4-(3,4,5-trimethoxyphenyl)-1,4-dihydropyridine-2,3-dicarboxylate (5e).**

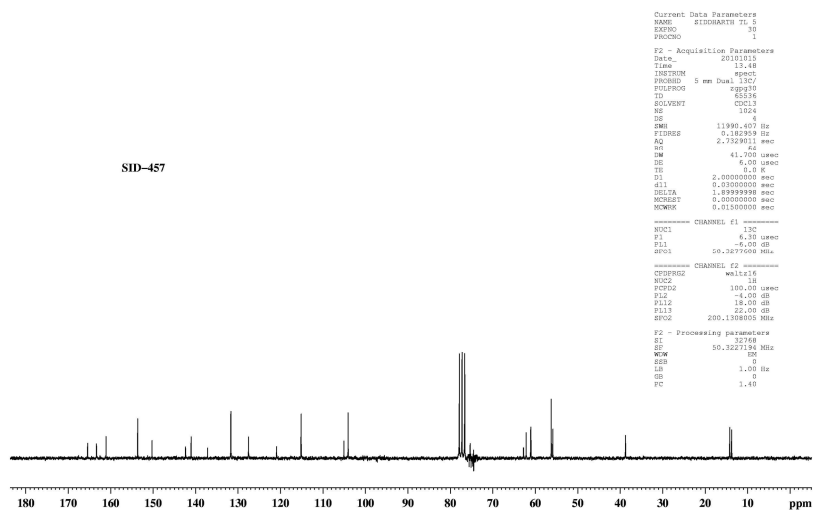

**Diethyl 6-amino-5-cyano-1-(4-methoxyphenyl)-4-(3,4,5-trimethoxyphenyl)-1,4-dihydropyridine-2,3-dicarboxylate (5e)**

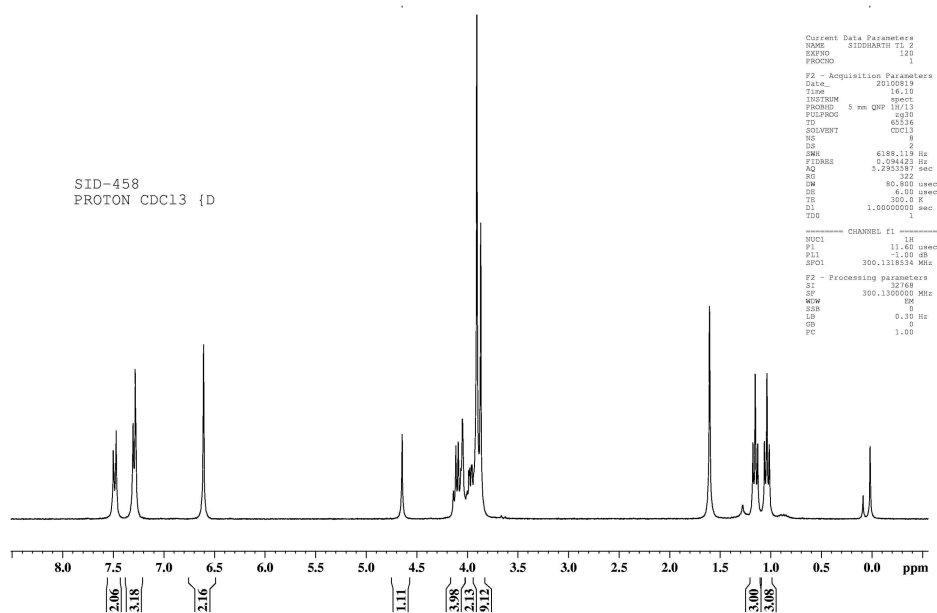

Diethyl 6-amino-1-(4-chlorophenyl)-5-cyano-4-(3,4,5-trimethoxyphenyl)-1,4-dihydropyridine-2,3-dicarboxylate (5f).

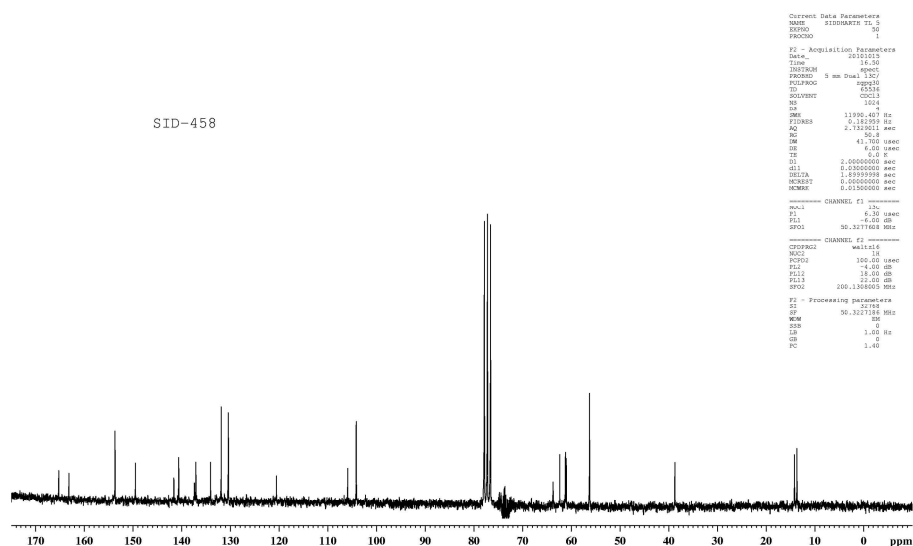

Diethyl 6-amino-1-(4-chlorophenyl)-5-cyano-4-(3,4,5-trimethoxyphenyl)-1,4-dihydropyridine-2,3-dicarboxylate (5f).

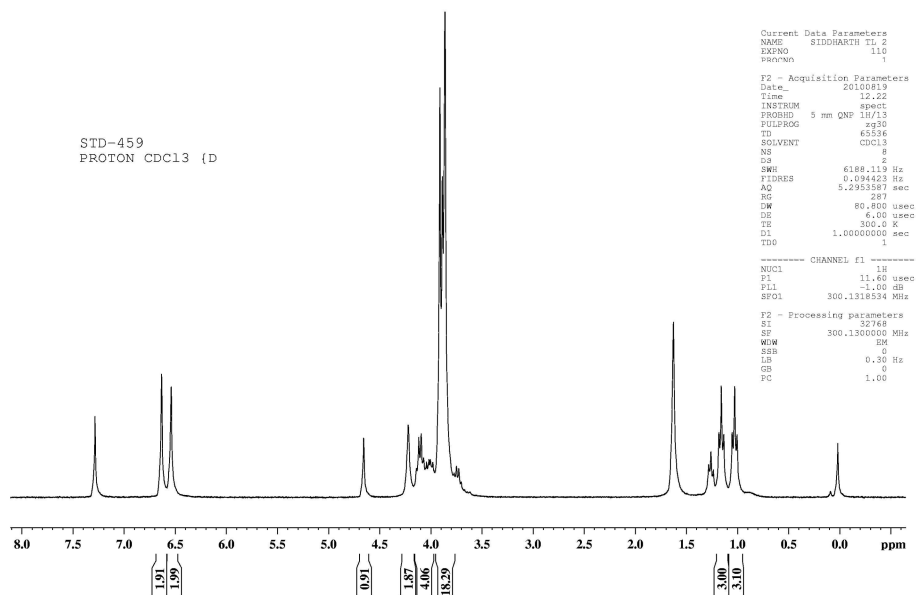

Diethyl 6-amino-5-cyano-1,4-bis(3,4,5-trimethoxyphenyl)-1,4-dihydropyridine-2,3-dicarboxylate (5g).

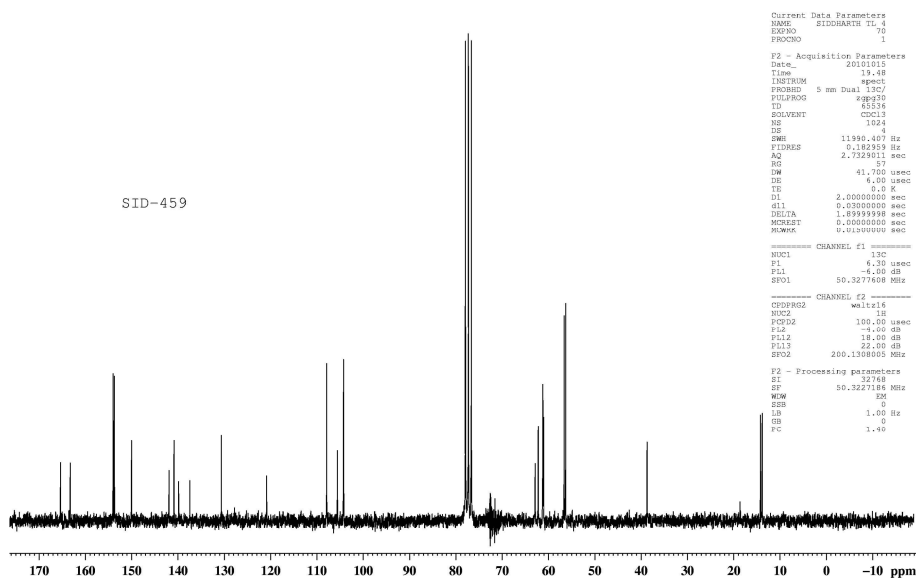

Diethyl 6-amino-5-cyano-1,4-bis(3,4,5-trimethoxyphenyl)-1,4-dihydropyridine-2,3-dicarboxylate (5g).

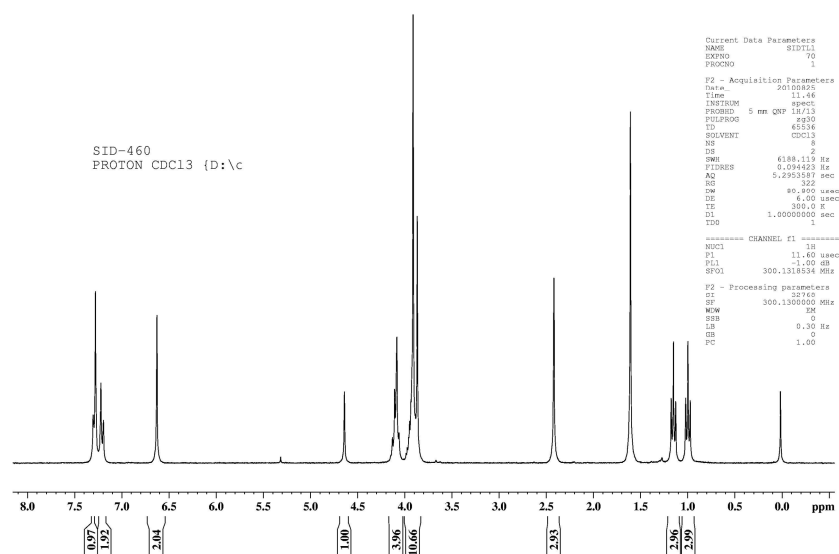

Diethyl 6-amino-5-cyano-1-p-tolyl-4-(3,4,5-trimethoxyphenyl)-1,4-dihydropyridine-2,3-dicarboxylate (5h)

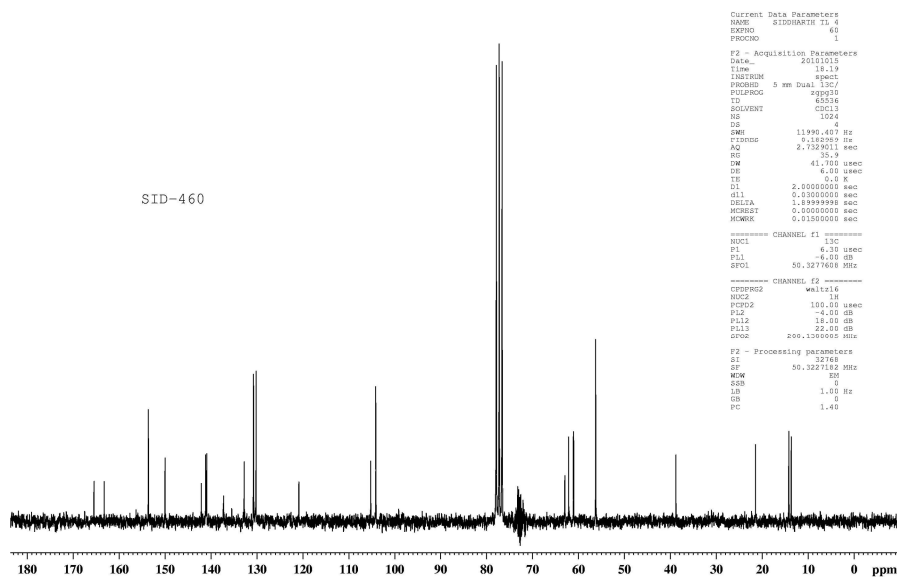

Diethyl 6-amino-5-cyano-1-p-tolyl-4-(3,4,5-trimethoxyphenyl)-1,4-dihydropyridine-2,3-dicarboxylate (5h)

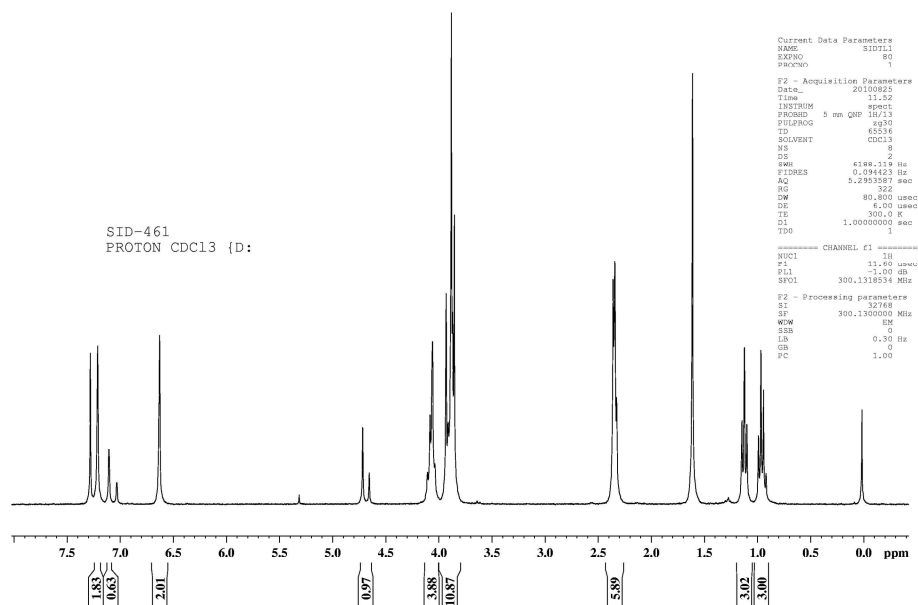

Diethyl 6-amino-5-cyano-1-(2,4-dimethylphenyl)-4-(3,4,5-trimethoxyphenyl)-1,4-dihydropyridine-2,3-dicarboxylate (5i).

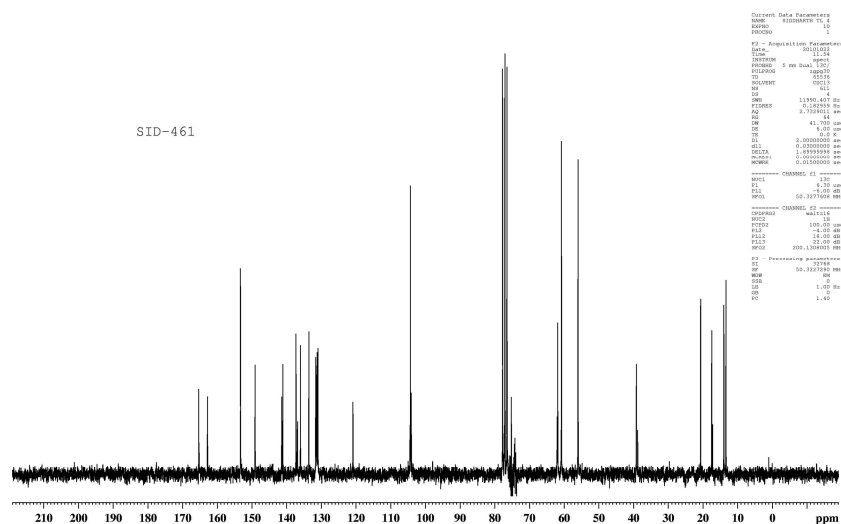

Diethyl 6-amino-5-cyano-1-(2,4-dimethylphenyl)-4-(3,4,5-trimethoxyphenyl)-1,4-dihydropyridine-2,3-dicarboxylate (5i).

SID-462  
PROTON CDC1

| Chemical Shift (ppm) | Integration |
|----------------------|-------------|
| ~7.5                 | 2.11        |
| ~7.2                 | 2.08        |
| ~6.6                 | 2.02        |
| ~4.5                 | 1.00        |
| ~4.1                 | 4.16        |
| ~3.9                 | 1.39        |
| ~3.7                 | 2.42        |
| ~1.6                 | 3.10        |
| ~1.1                 | 3.17        |

```

Current Data Parameters
NAME      SID611
EXPNO     90
PROCNO    1

F2 - Acquisition Parameters
Date_     20100825
Time      11:59
INSTRUM   spect
PROBHD    5 mm QNP 1H/1
PULPROG   zg30
TD         65536
SOLVENT   CDCl3
NS         8
DS         2
SWH        6188.119 Hz
FIDRES    0.094223 Hz
AQ         5.2953587 sec
RG         382
WDW         EM
SSB         0.000000 sec
DE         6.00 usec
TE         300.2 K
TE2        1.0000000 sec
D1         1.0000000 sec
DELTA      1

===== CHANNEL f1 =====
NUC1       1H
P1         11.60 usec
PL1        -1.00 dB
SFO1       300.1318534 MHz

F2 - Processing parameters
SI         32768
SF         300.1300000 MHz
WDW        EM
SSB        0
GB         0
PC         1.00
  
```

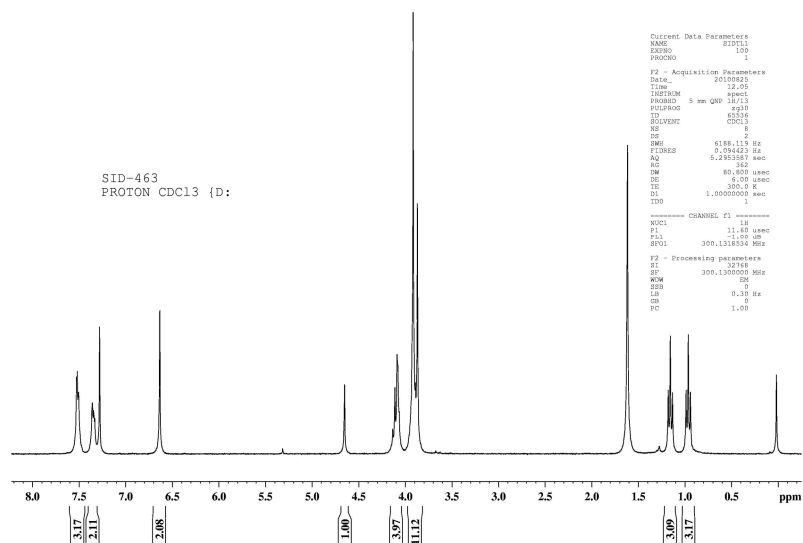

Diethyl 6-amino-5-cyano-1-phenyl-4-(3,4,5-trimethoxyphenyl)-1,4-dihydropyridine-2,3-dicarboxylate (5k).

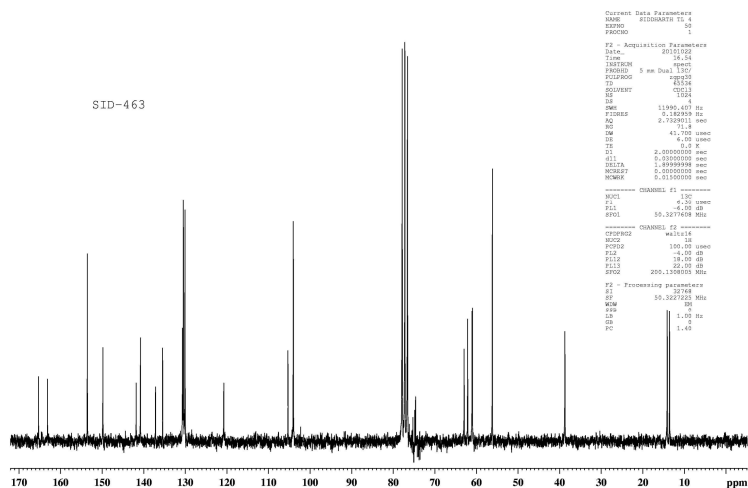

Diethyl 6-amino-5-cyano-1-phenyl-4-(3,4,5-trimethoxyphenyl)-1,4-dihydropyridine-2,3-dicarboxylate (5k).



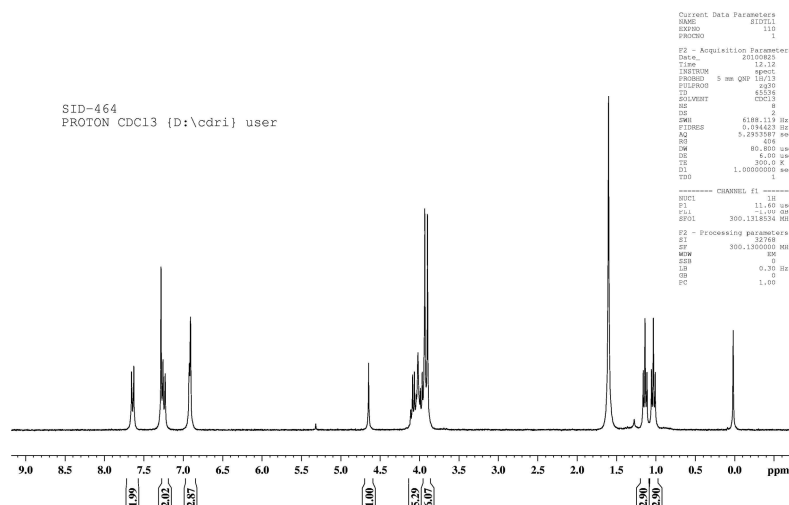

Diethyl 6-amino-1-(4-bromophenyl)-5-cyano-4-(3,4-dimethoxyphenyl)-1,4-dihydropyridine-2,3-dicarboxylate (51).

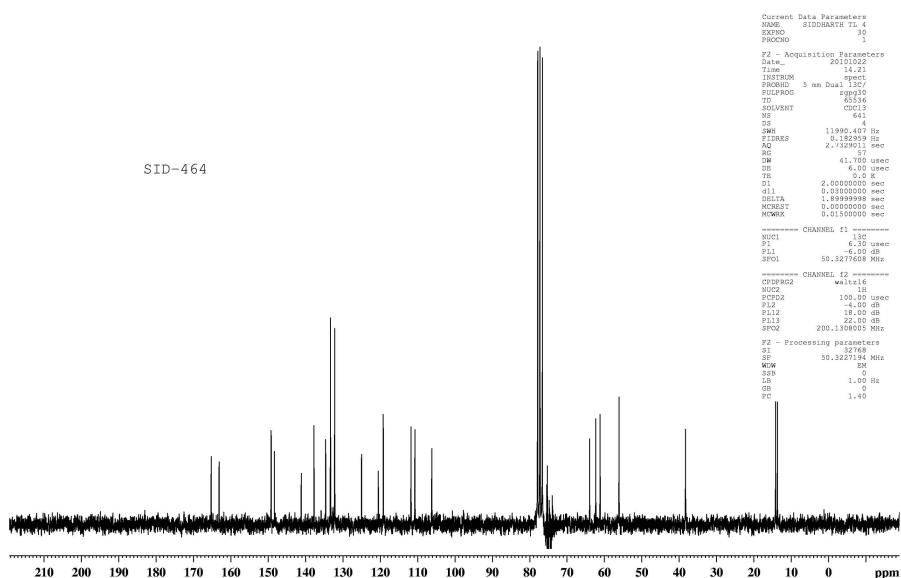

Diethyl 6-amino-1-(4-bromophenyl)-5-cyano-4-(3,4-dimethoxyphenyl)-1,4-dihydropyridine-2,3-dicarboxylate (51).

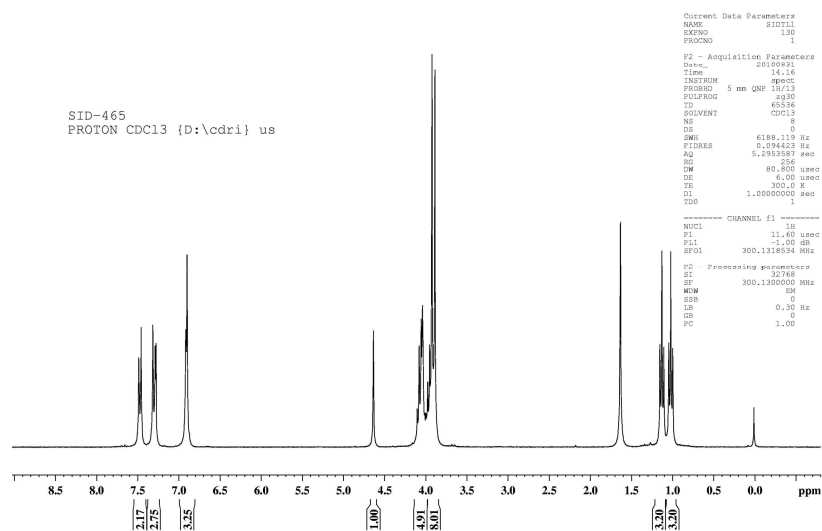

**Diethyl 6-amino-1-(4-chlorophenyl)-5-cyano-4-(3,4-dimethoxyphenyl)-1,4-dihydropyridine-2,3-dicarboxylate (5m).**

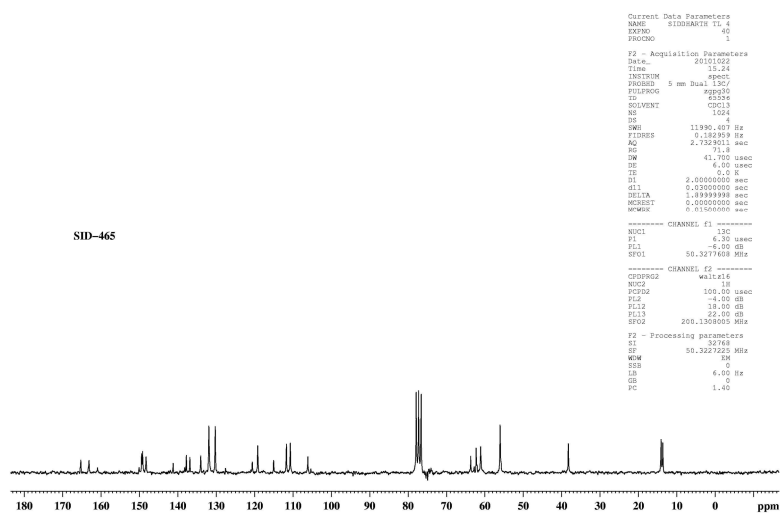

**Diethyl 6-amino-1-(4-chlorophenyl)-5-cyano-4-(3,4-dimethoxyphenyl)-1,4-dihydropyridine-2,3-dicarboxylate (5m).**

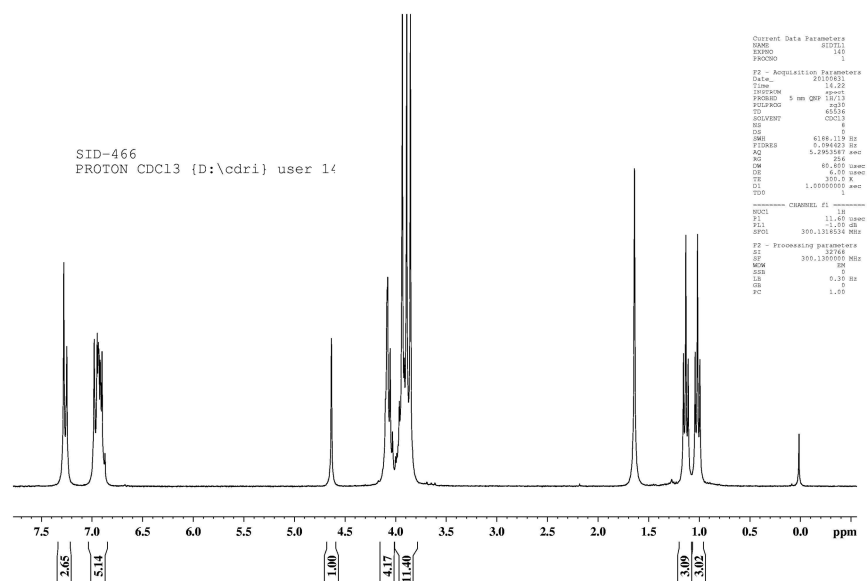

**Diethyl 6-amino-5-cyano-4-(3,4-dimethoxyphenyl)-1-(4-methoxyphenyl)-1,4-dihydropyridine-2,3-dicarboxylate (5n).**

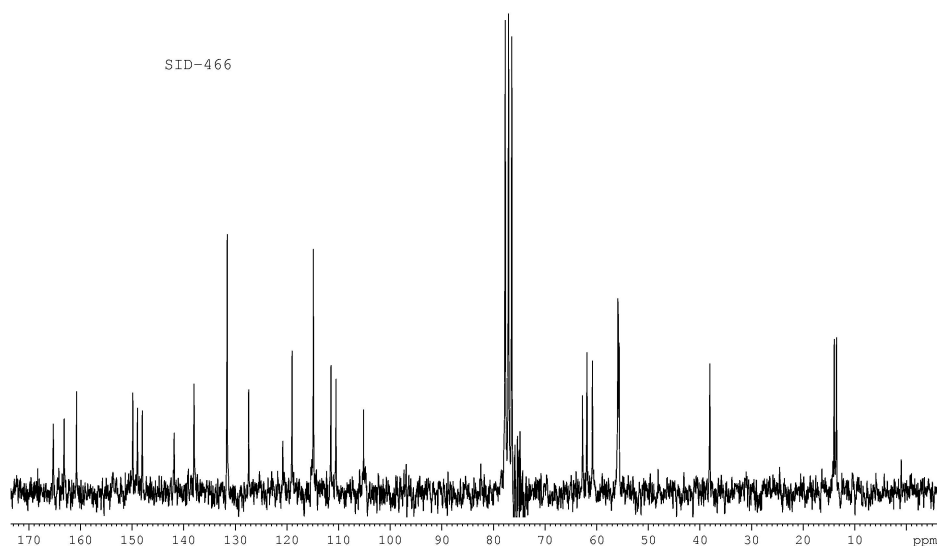

**Diethyl 6-amino-5-cyano-4-(3,4-dimethoxyphenyl)-1-(4-methoxyphenyl)-1,4-dihydropyridine-2,3-dicarboxylate (5n).**

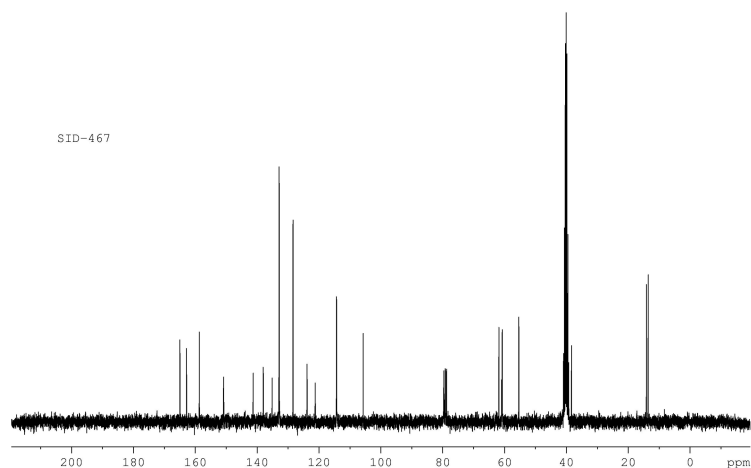

**Diethyl 6-amino-1-(4-bromophenyl)-5-cyano-4-(4-methoxyphenyl)-1,4-dihydropyridine-2,3-dicarboxylate (5o).**

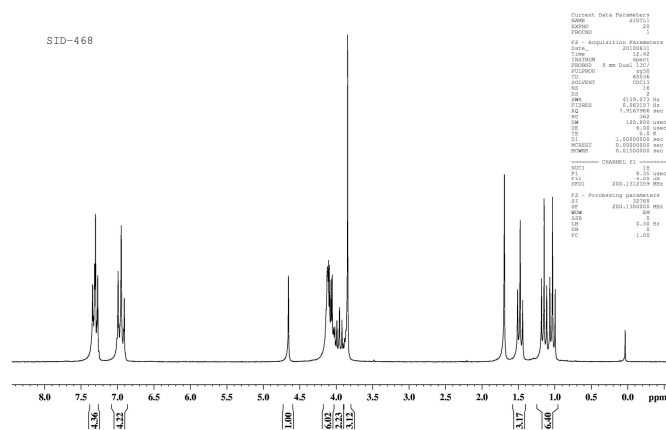

**Diethyl 6-amino-5-cyano-1-(4-ethoxyphenyl)-4-(4-methoxyphenyl)-1,4-dihydropyridine-2,3-dicarboxylate (5p).**

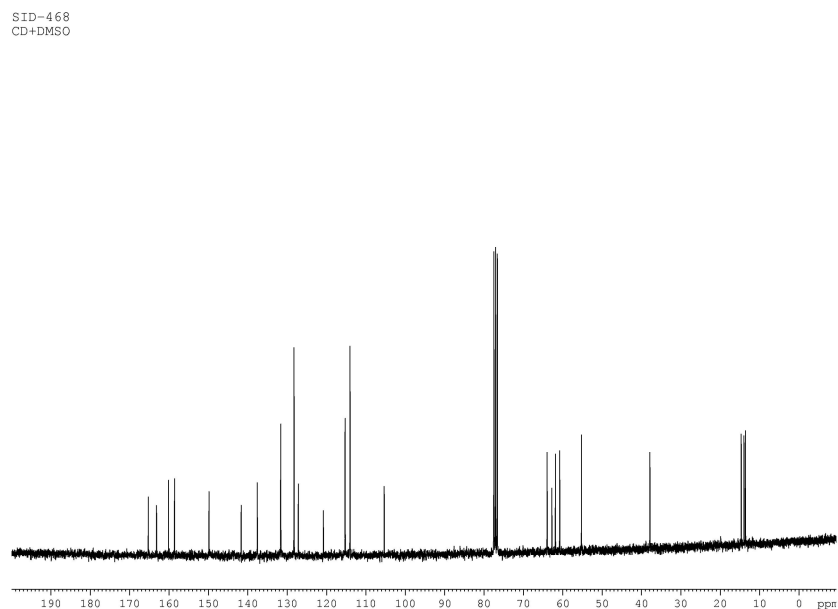

**Diethyl 6-amino-5-cyano-1-(4-ethoxyphenyl)-4-(4-methoxyphenyl)-1,4-dihydropyridine-2,3-dicarboxylate (5p).**

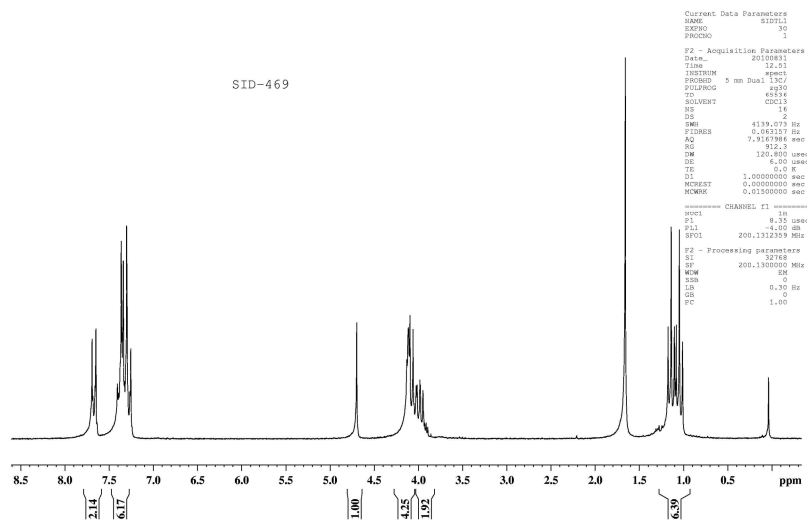

Diethyl 6-amino-1-(4-bromophenyl)-4-(4-chlorophenyl)-5-cyano-1,4-dihydropyridine-2,3-dicarboxylate  
(5q)

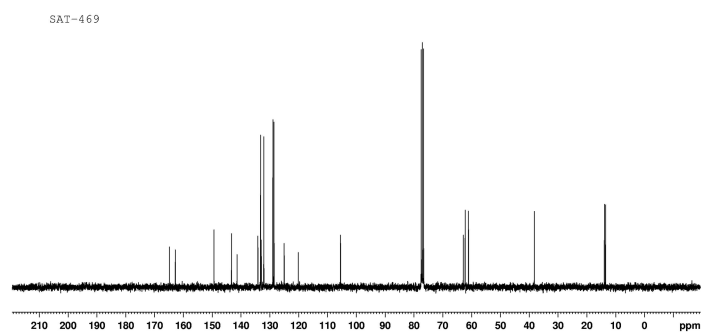

Diethyl 6-amino-1-(4-bromophenyl)-4-(4-chlorophenyl)-5-cyano-1,4-dihydropyridine-2,3-dicarboxylate  
(5q).

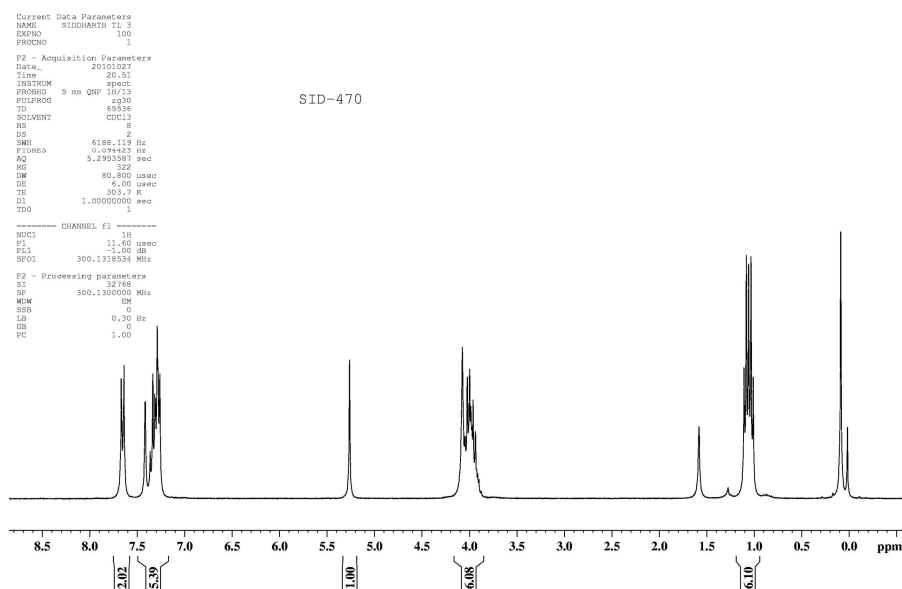

**Diethyl 6-amino-1-(4-bromophenyl)-5-cyano-4-(2,4-dichlorophenyl)-1,4-dihydropyridine-2,3-dicarboxylate (5r).**

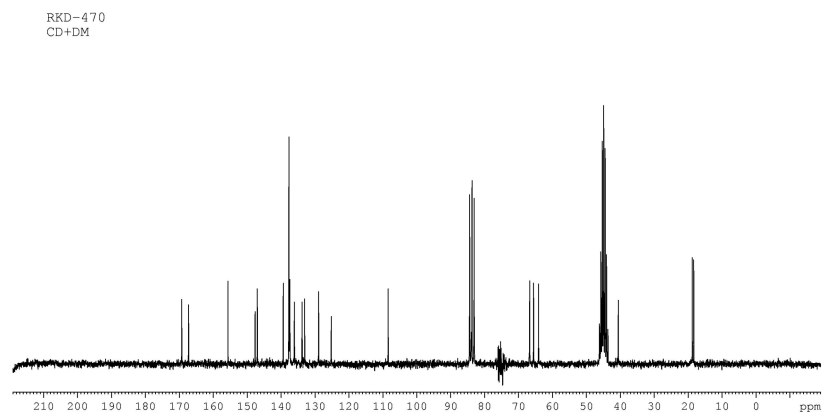

**Diethyl 6-amino-1-(4-bromophenyl)-5-cyano-4-(2,4-dichlorophenyl)-1,4-dihydropyridine-2,3-dicarboxylate (5r).**

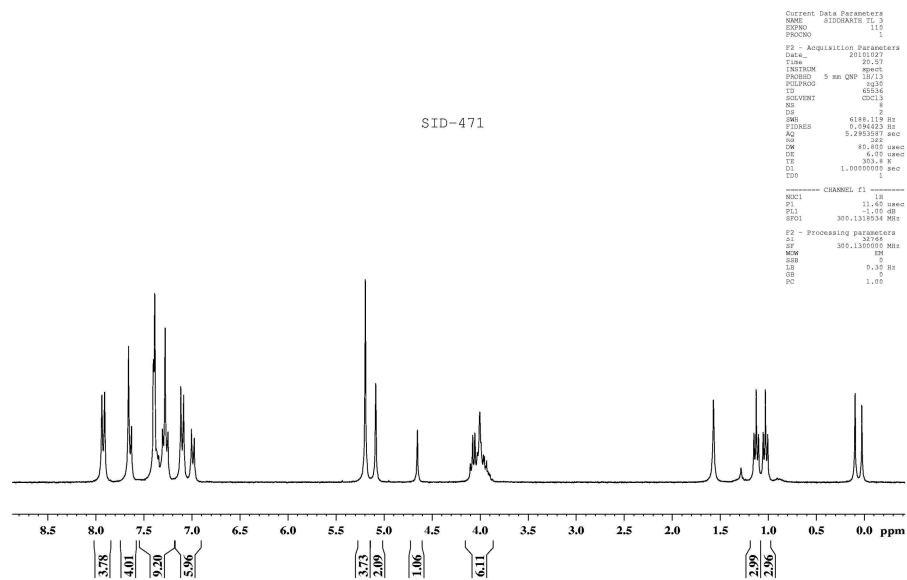

Diethyl 6-amino-4-(4-(benzyloxy)phenyl)-1-(4-bromophenyl)-5-cyano-1,4-dihydropyridine-2,3-dicarboxylate (5s).

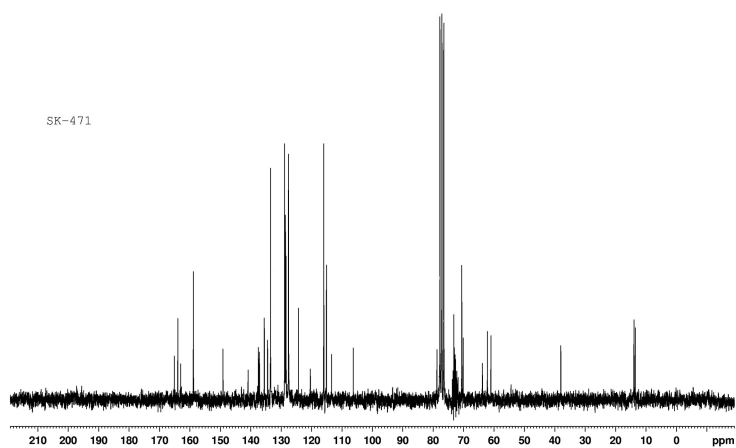

Diethyl 6-amino-4-(4-(benzyloxy)phenyl)-1-(4-bromophenyl)-5-cyano-1,4-dihydropyridine-2,3-dicarboxylate (5s).



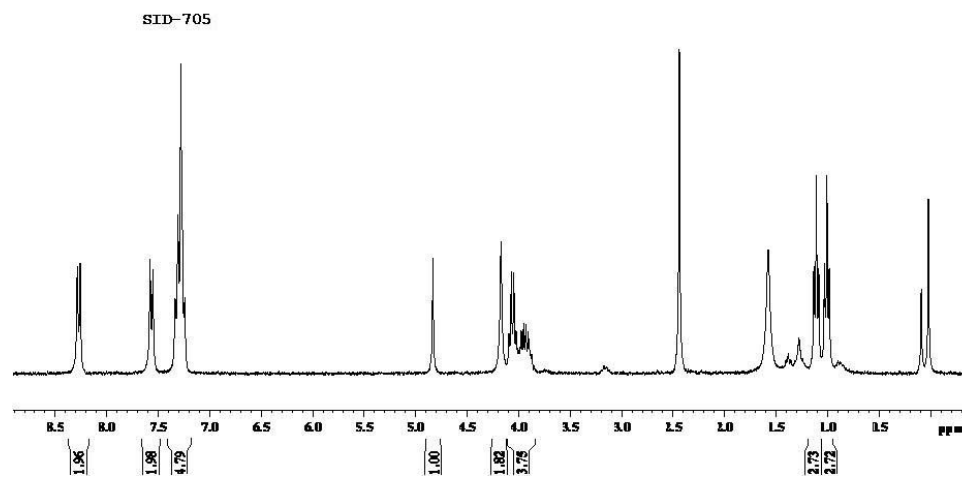

**Diethyl 6-amino-5-cyano-4-(4-nitrophenyl)-1-p-tolyl-1,4-dihydropyridine-2,3-dicarboxylate (5t).**

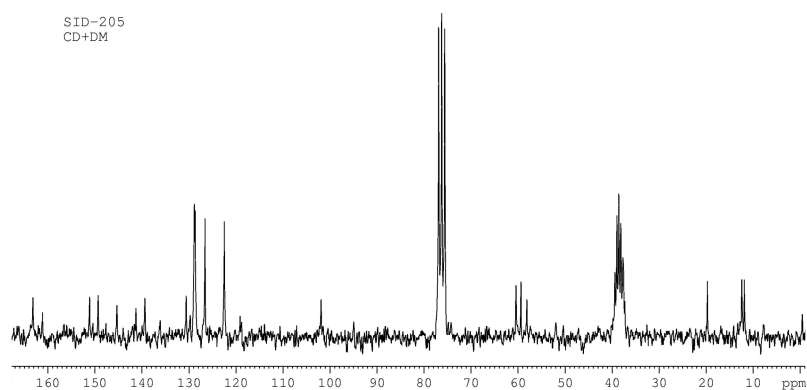

**Diethyl 6-amino-5-cyano-4-(4-nitrophenyl)-1-p-tolyl-1,4-dihydropyridine-2,3-dicarboxylate (5t).**

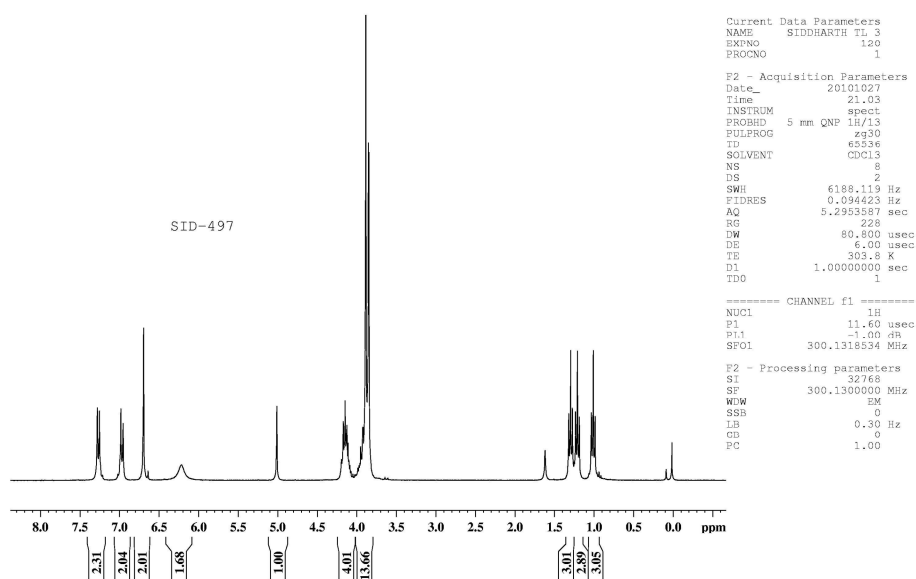

Triethyl 6-amino-1-(4-methoxyphenyl)-4-(3,4,5-trimethoxyphenyl)-1,4-dihydropyridine-2,3,5-tricarboxylate (6a).

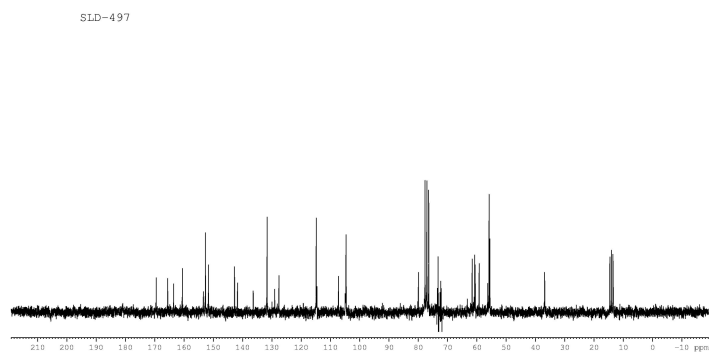

Triethyl 6-amino-1-(4-methoxyphenyl)-4-(3,4,5-trimethoxyphenyl)-1,4-dihydropyridine-2,3,5-tricarboxylate (6a).

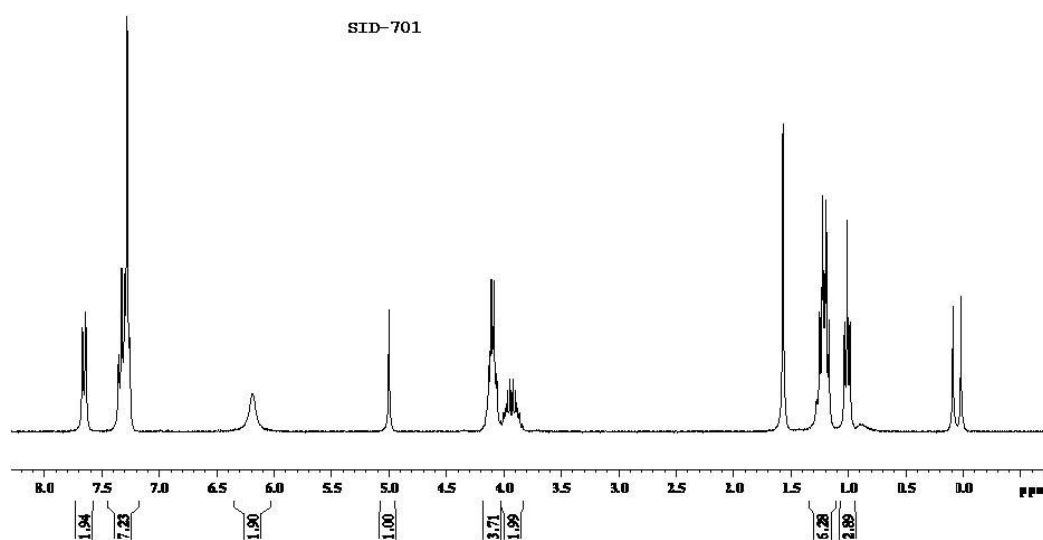

Triethyl 6-amino-1-(4-bromophenyl)-4-(4-chlorophenyl)-1,4-dihydropyridine-2,3,5-tricarboxylate (6b).

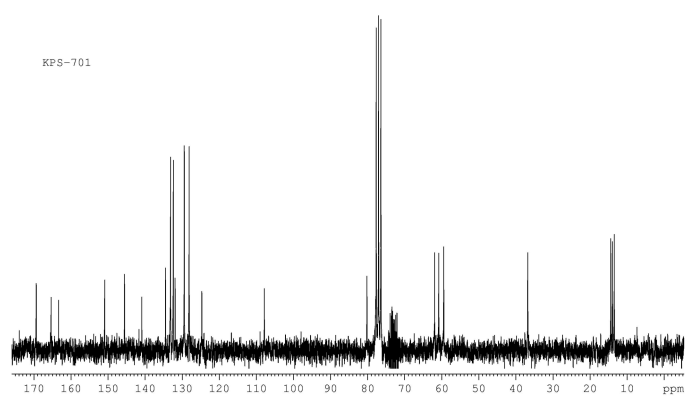

Triethyl 6-amino-1-(4-bromophenyl)-4-(4-chlorophenyl)-1,4-dihydropyridine-2,3,5-tricarboxylate (6b).

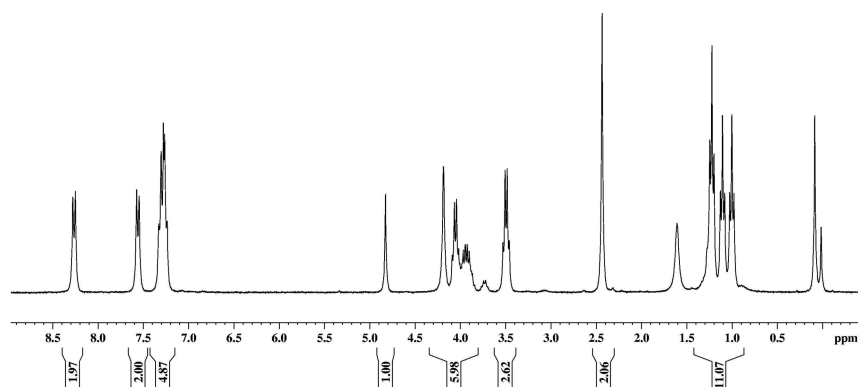

**Triethyl 6-amino-4-(4-nitrophenyl)-1-p-tolyl-1,4-dihydropyridine-2,3,5-tricarboxylate (6c).**

SID-653

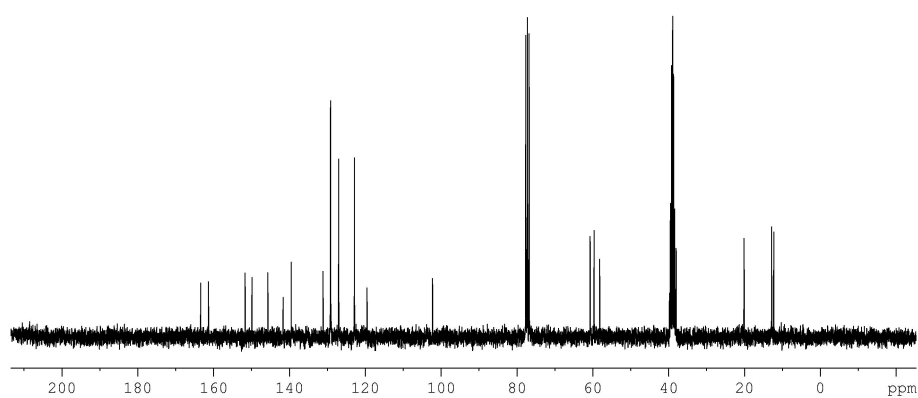

**Triethyl 6-amino-4-(4-nitrophenyl)-1-p-tolyl-1,4-dihydropyridine-2,3,5-tricarboxylate (6c).**

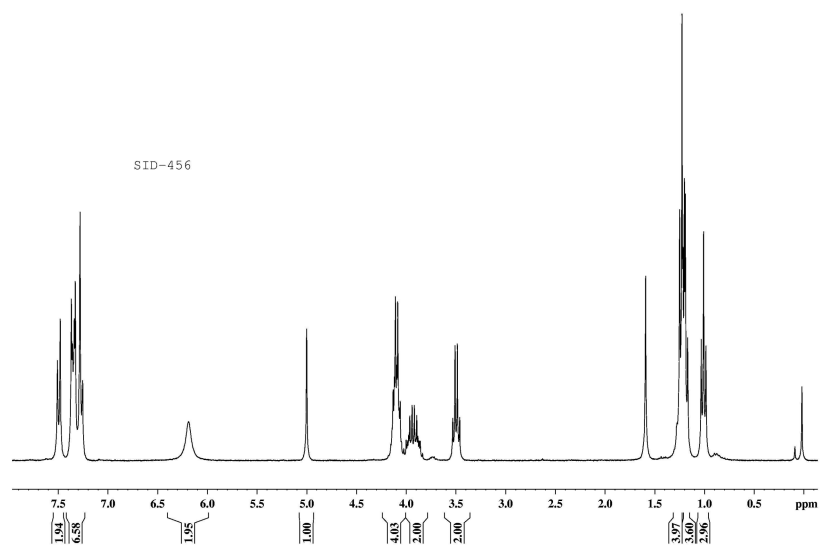

**Triethyl 6-amino-1,4-bis(4-chlorophenyl)-1,4-dihydropyridine-2,3,5-tricarboxylate (6d).**

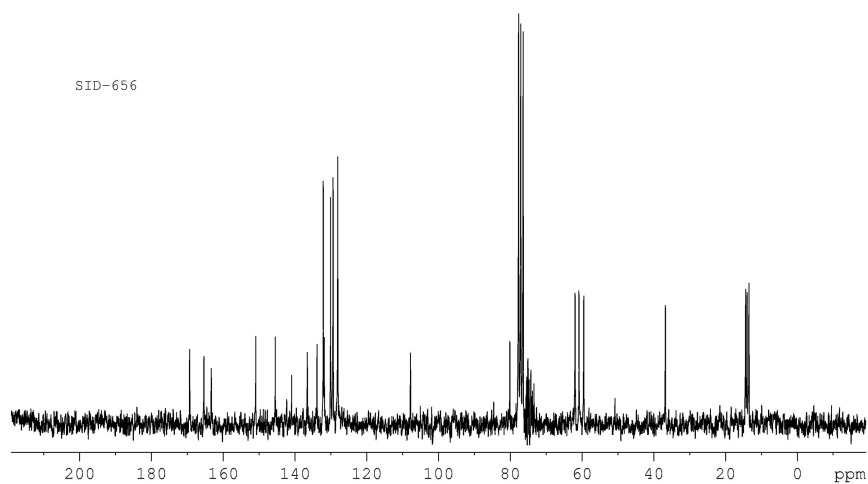

**Triethyl 6-amino-1,4-bis(4-chlorophenyl)-1,4-dihydropyridine-2,3,5-tricarboxylate (6d).**

SID-706

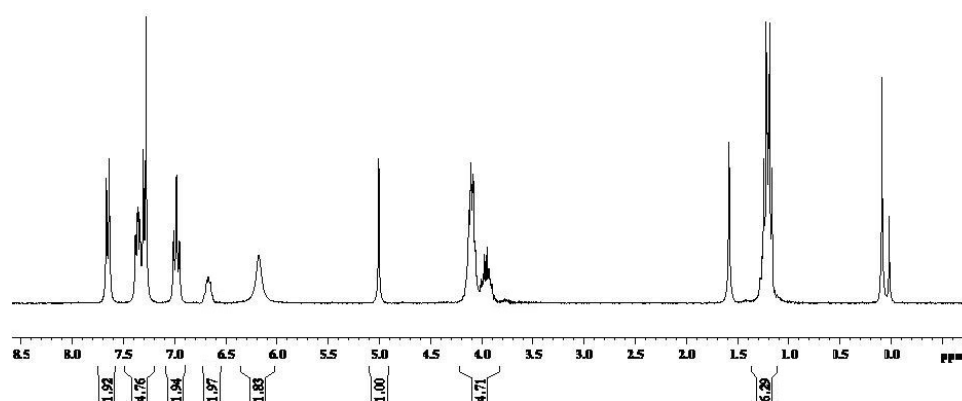

**Diethyl 6-amino-5-carbamoyl-1,4-bis(4-chlorophenyl)-1,4-dihydropyridine-2,3-dicarboxylate (6e).**

SID-706 (AMIDE)

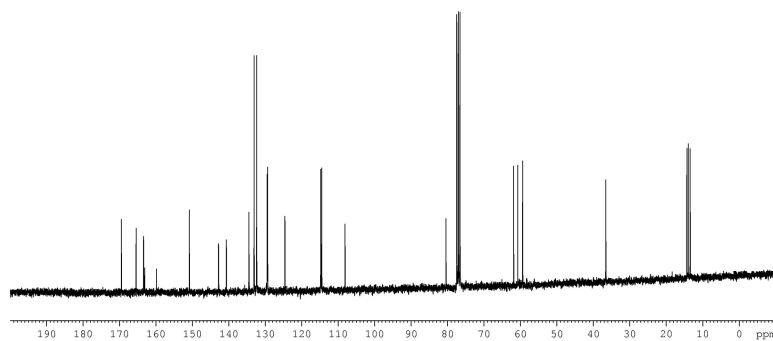

**Diethyl 6-amino-5-carbamoyl-1,4-bis(4-chlorophenyl)-1,4-dihydropyridine-2,3-dicarboxylate (6e).**

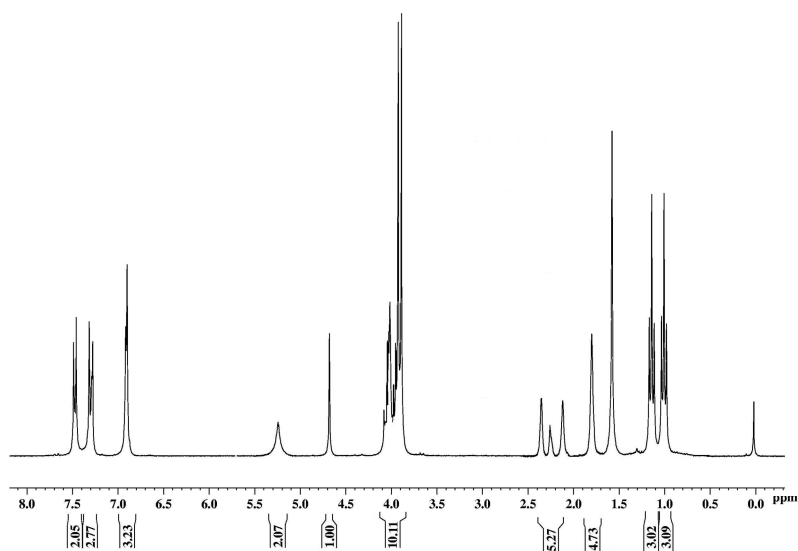

**Diethyl** **5-amino-1-(4-chlorophenyl)-4-(3,4-dimethoxyphenyl)-1,4,6,7,8,9-hexahydrobenzo[b][1,8]naphthyridine-2,3-dicarboxylate (7a).**

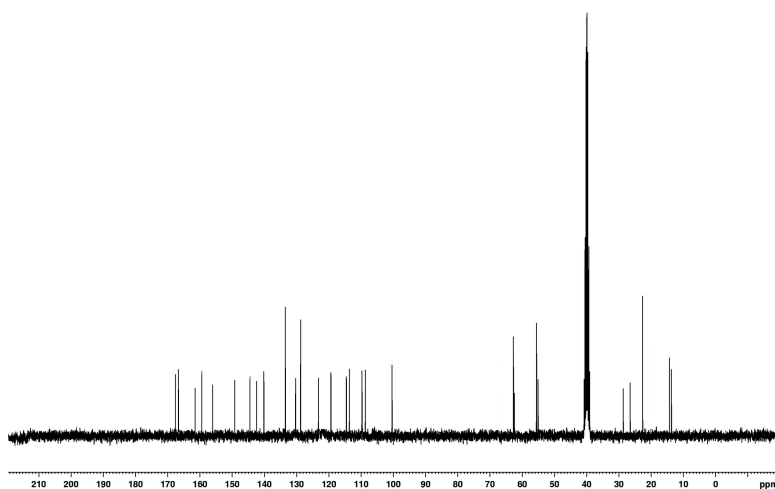

**Diethyl** **5-amino-1-(4-chlorophenyl)-4-(3,4-dimethoxyphenyl)-1,4,6,7,8,9-hexahydrobenzo[b][1,8]naphthyridine-2,3-dicarboxylate (7a).**

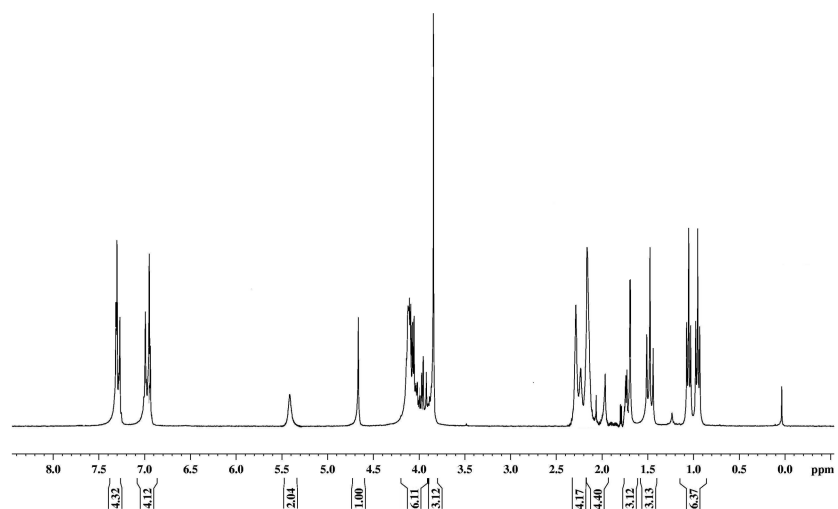

**Diethyl** **5-amino-1-(4-ethoxyphenyl)-4-(4-methoxyphenyl)-1,4,6,7,8,9-hexahydrobenzo[b][1,8]naphthyridine-2,3-dicarboxylate (7b).**

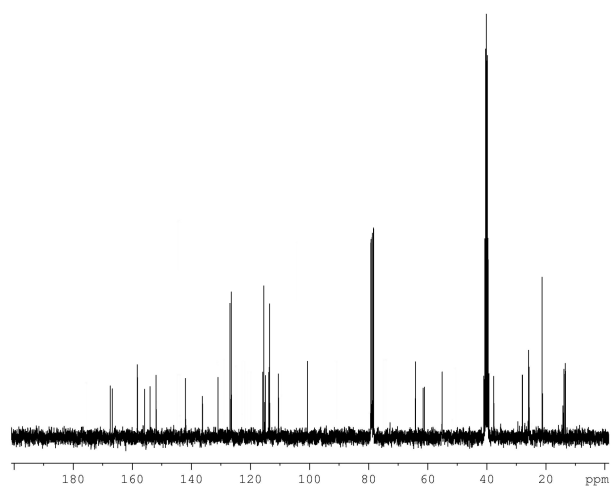

**Diethyl** **5-amino-1-(4-ethoxyphenyl)-4-(4-methoxyphenyl)-1,4,6,7,8,9-hexahydrobenzo[b][1,8]naphthyridine-2,3-dicarboxylate (7b).**



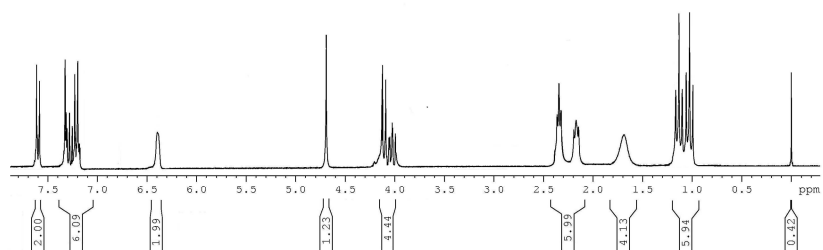

**Diethyl 5-amino-1-(4-bromophenyl)-4-(4-chlorophenyl)-1,4,6,7,8,9-hexahydrobenzo[b][1,8]naphthyridine-2,3-dicarboxylate (7c).**

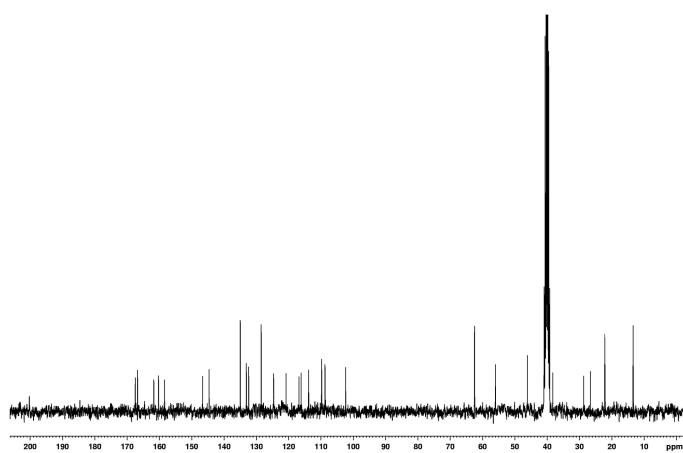

**Diethyl 5-amino-1-(4-bromophenyl)-4-(4-chlorophenyl)-1,4,6,7,8,9-hexahydrobenzo[b][1,8]naphthyridine-2,3-dicarboxylate (7c).**

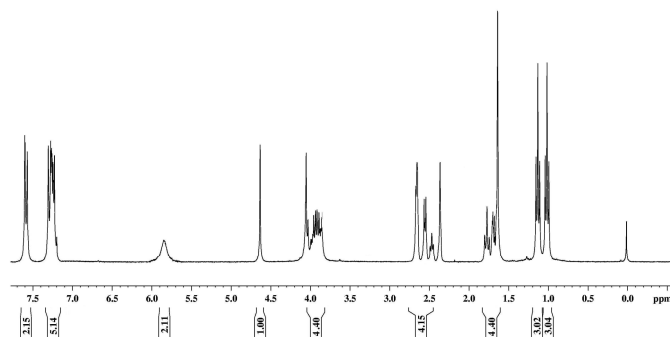

**Diethyl** **5-amino-1-(4-bromophenyl)-4-(2,4-dichlorophenyl)-1,4,6,7,8,9-hexahydrobenzo[b][1,8]naphthyridine-2,3-dicarboxylate (7d).**

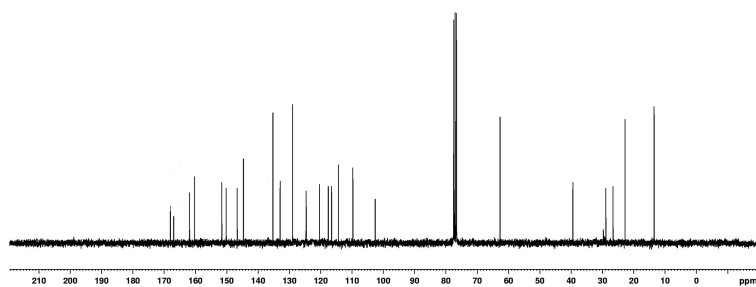

**Diethyl** **5-amino-1-(4-bromophenyl)-4-(2,4-dichlorophenyl)-1,4,6,7,8,9-hexahydrobenzo[b][1,8]naphthyridine-2,3-dicarboxylate (7d).**

SID-455

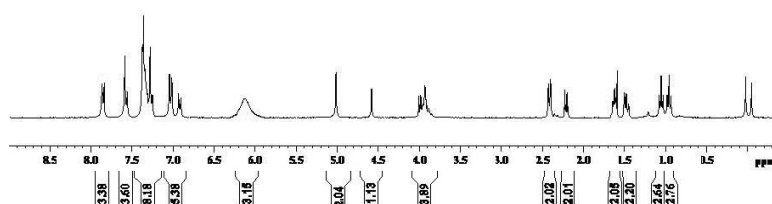

**Diethyl** **5-amino-4-(4-(benzyloxy)phenyl)-1-(4-bromophenyl)-1,4,6,7,8,9-hexahydrobenzo[b][1,8]naphthyridine-2,3-dicarboxylate (7e).**

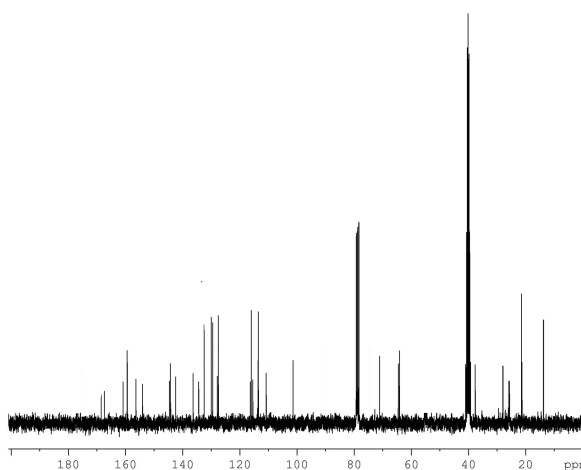

**Diethyl** **5-amino-4-(4-(benzyloxy)phenyl)-1-(4-bromophenyl)-1,4,6,7,8,9-hexahydrobenzo[b][1,8]naphthyridine-2,3-dicarboxylate (7e).**

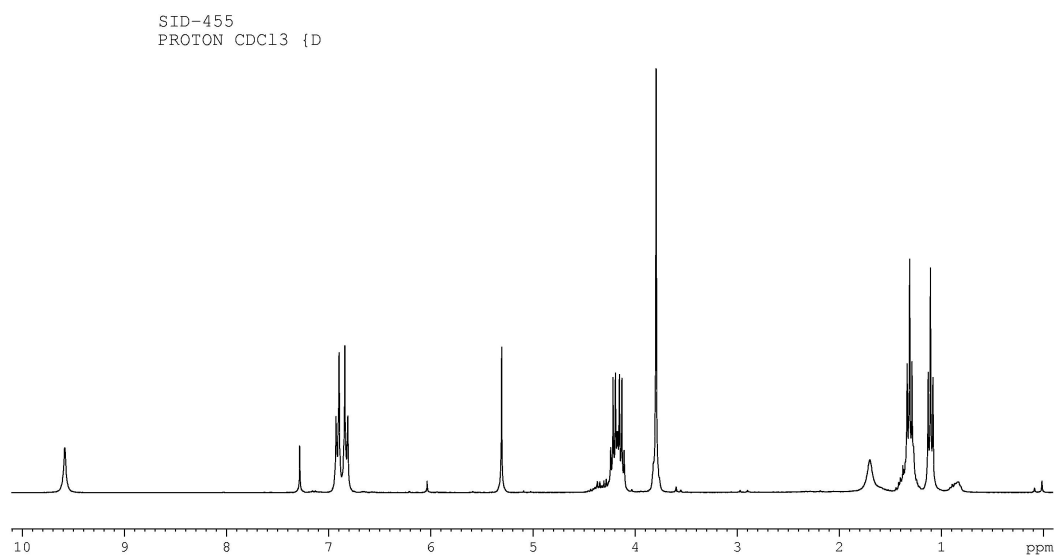

**Diethyl 2-(4-methoxyphenylamino)maleate ((Intermediate)).**
